# Supplementary material for: Spectroscopic characterization of a Ru(iii)-OCl intermediate: a structural mimic of haloperoxidase enzymes
Source: Royal Society of Chemistry journal article supplement (doi:10.1039/d2dt01947g), 2022-01-01
Supplement: d2dt01947g1.pdf [file d2dt01947g1.pdf]

Supporting online information for

## Spectroscopic characterization of a Ru(III)-OCl intermediate: A structural mimic for haloperoxidase enzyme

Rakesh Kumar, Ayushi Awasthi, Sikha Gupta, Raju Eerlapally and Apparao Draksharapu\*

Department of Chemistry, Indian Institute of Technology Kanpur, Kanpur–208016 (India)

### Material and Methods

**Synthesis of N<sup>1</sup>-benzyl-N<sup>1</sup>,N<sup>2</sup>,N<sup>2</sup>-tris(pyridin-2-ylmethyl)ethane-1,2-diamine (BnTPEN):** Synthesis of BnTPEN ligand was carried out by modified literature procedure.<sup>1</sup> Picolylchloride hydrochloride salt (1.64 g, 10 mmol) was dissolved in 15 mL H<sub>2</sub>O followed by the addition of N<sup>1</sup>-benzylethane-1,2-diamine (500 mg, 3.33 mmol) in a 50 mL round-bottom flask equipped with a stir bar. Aqueous NaOH solution (800 mg in 10 mL) was added dropwise over a period of an hour and the reaction was stirred at room temperature for 7 days. After 7 days the reaction mixture was extracted in methylene chloride (3 x 25 mL). The combined organic phases were dried over Na<sub>2</sub>SO<sub>4</sub> followed by the solvent evaporation under reduced pressure. Recrystallization from hot hexane yielded block like crystals of BnTPEN in 4 to 6 h. Yield: 940 mg, 66.7%. Characterization: <sup>1</sup>H NMR (CDCl<sub>3</sub>, 400 MHz): δ (ppm) 8.50-8.47 (m, 3H), 7.59-7.56 (m, 3H), 7.45 (dd, 3H, J = 19.25 Hz, 8 Hz), 7.30-7.27 (m, 3H), 7.25-7.20 (m, 2H), 7.13-7.10 (m, 3H), 3.78 (s, 4H), 3.73 (s, 2H), 3.59 (s, 2H), 2.77-2.74 (m, 2H), 2.72-2.69 (m, 2H). <sup>13</sup>C NMR (CDCl<sub>3</sub>, 100 MHz): δ (ppm) 160.27, 159.84, 149.03, 148.87, 139.31, 136.44, 128.90, 128.29, 126.99, 122.88, 121.96, 121.90, 60.88, 60.68, 59.12, 52.35, 52.02.

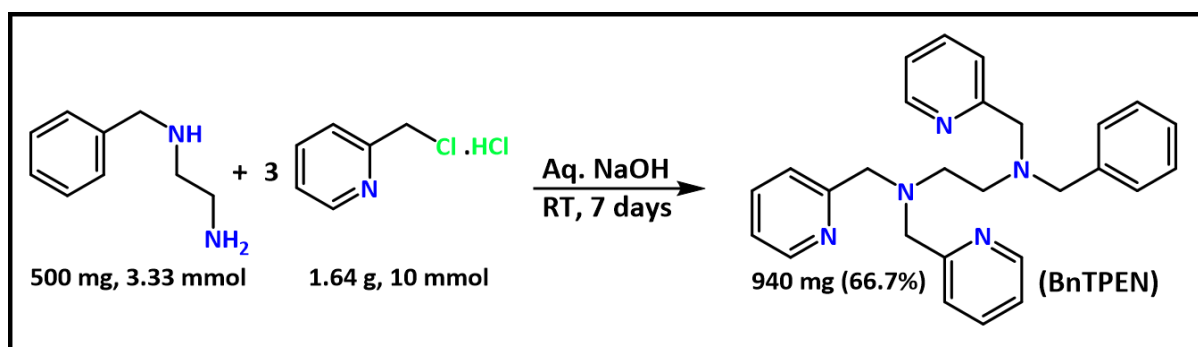

**Scheme S1:** Synthetic procedure for BnTPEN.

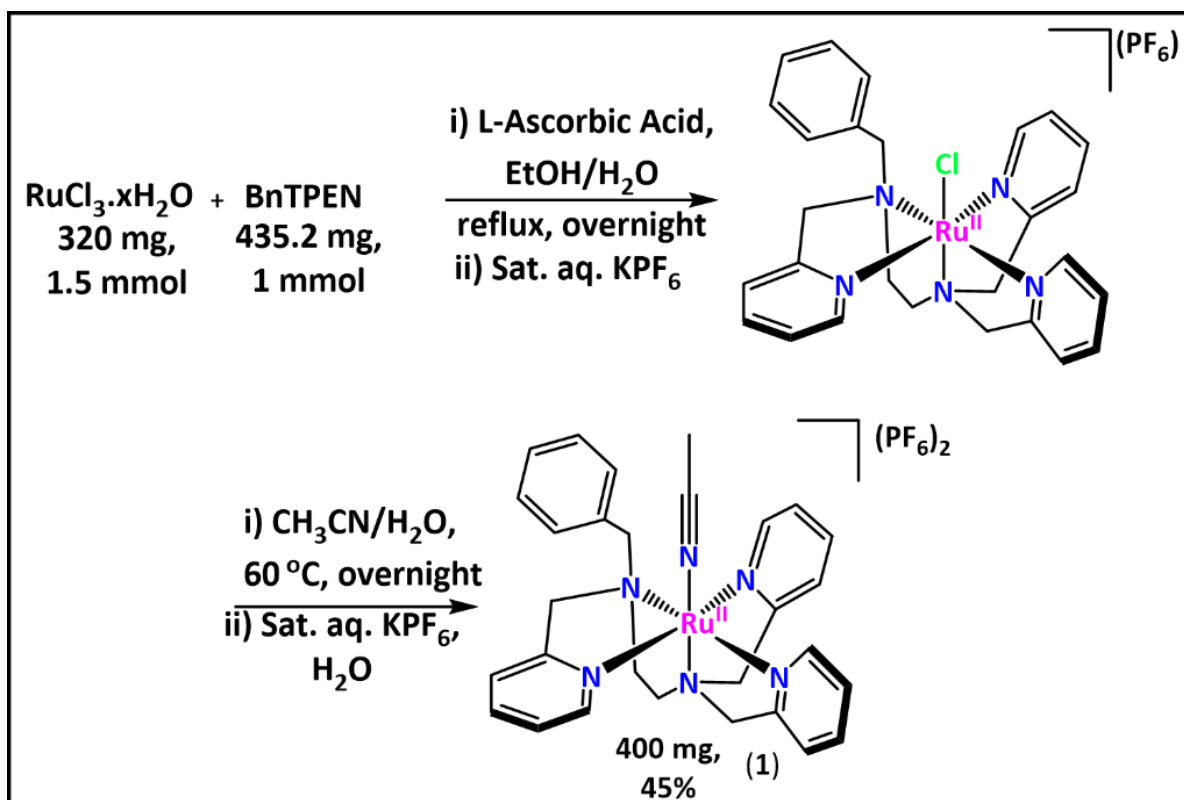

Scheme S2: Synthetic procedure for [Ru<sup>II</sup>(BnTPEN)(NCCH<sub>3</sub>)](PF<sub>6</sub>)<sub>2</sub> (**1**).

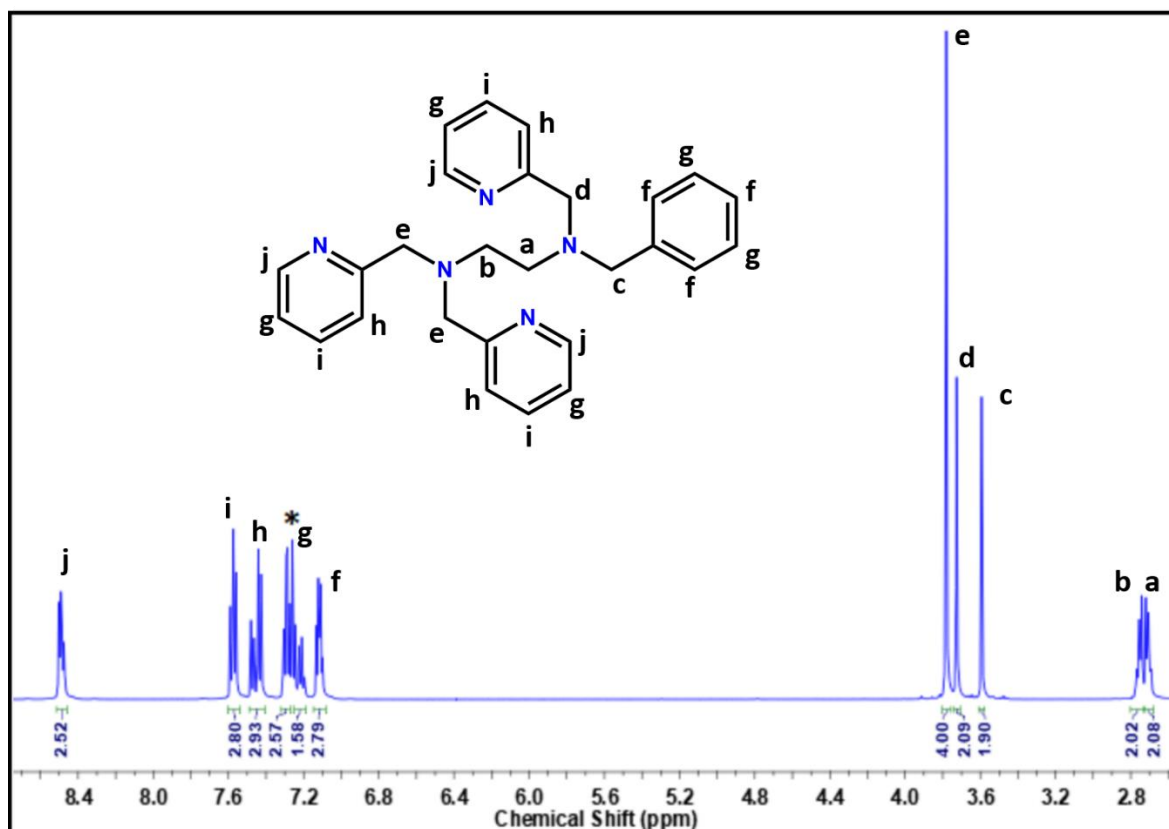

Figure S1: <sup>1</sup>H NMR spectrum of BnTPEN in CDCl<sub>3</sub> at 400 MHz. (\* peak for solvent)

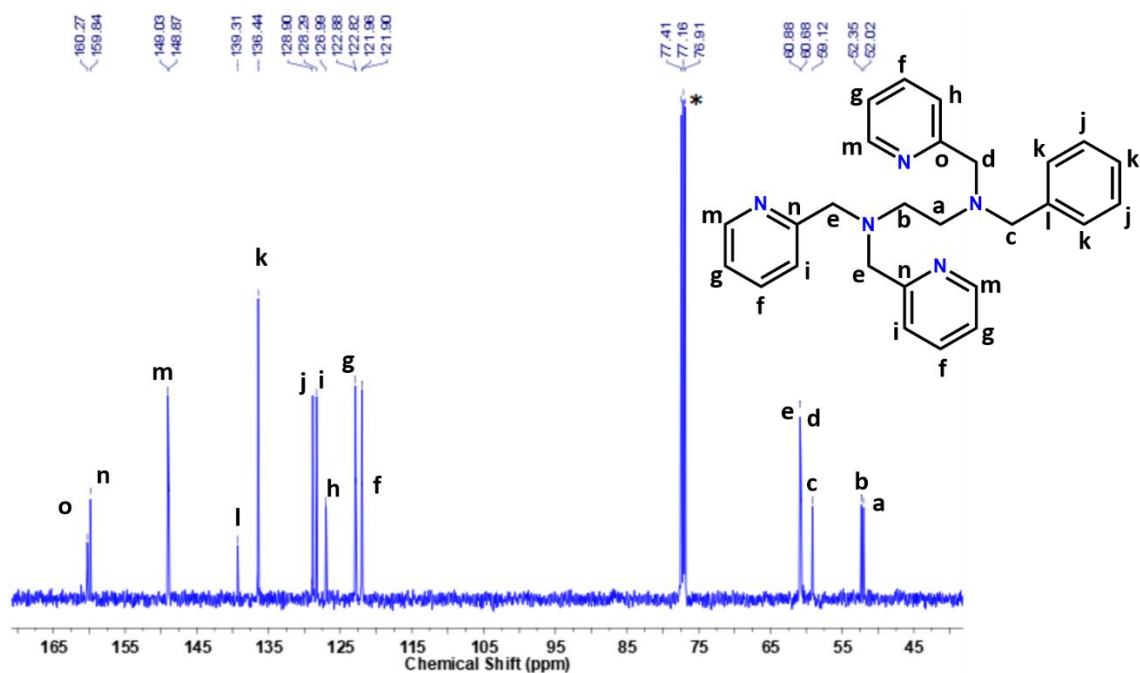

**Figure S2:**  $^{13}\text{C}\{^1\text{H}\}$  NMR spectrum of BnTPEN in  $\text{CDCl}_3$  at 100 MHz. (\* peak for solvent)

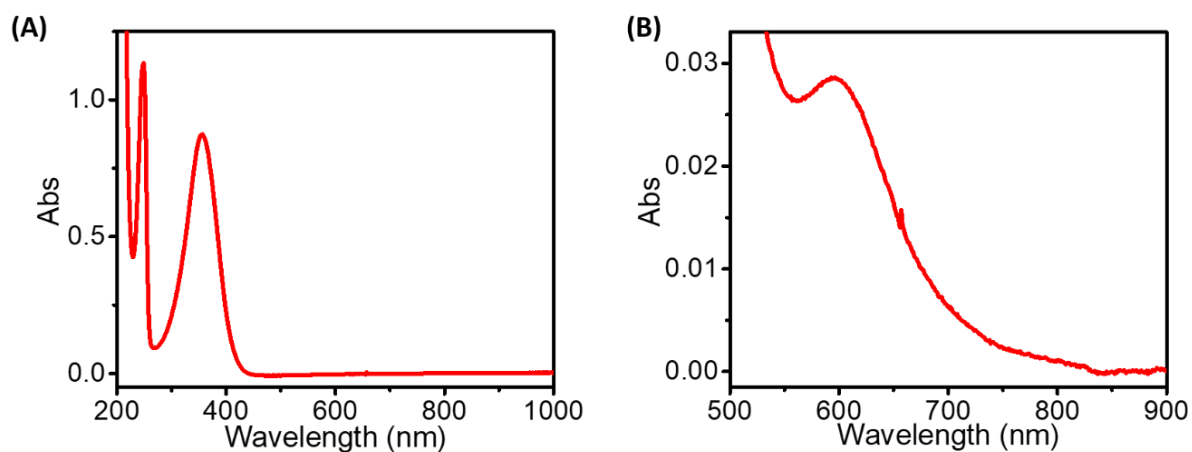

**Figure S3:** UV/Vis absorption spectra (A) 0.06 mM and (B) 4 mM of  $[\text{Ru}^{\text{II}}(\text{BnTPEN})(\text{NCCH}_3)](\text{PF}_6)_2$  (**1**) in  $\text{CH}_3\text{CN}$  at room temperature. d-d transition at 595 nm is visible at higher concentrations.

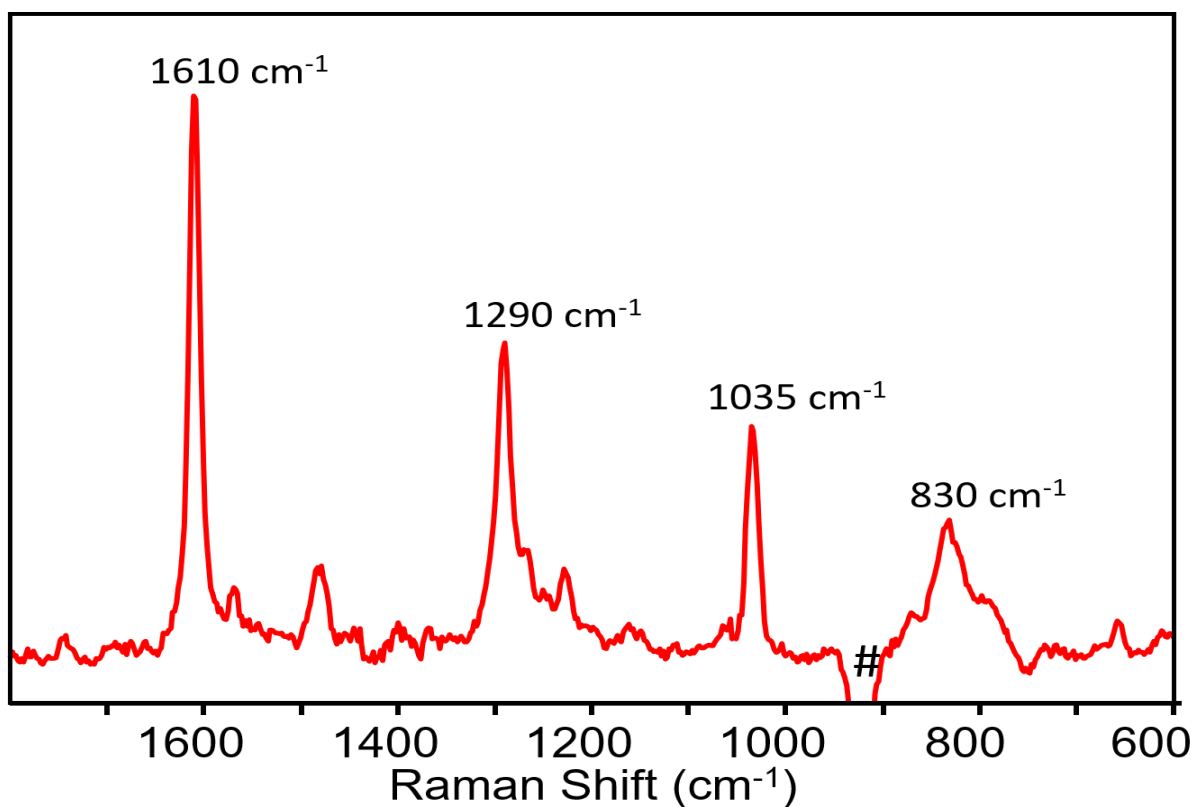

**Figure S4:** Solvent subtracted resonance Raman spectrum of **1** in acetonitrile at  $\lambda_{\text{exc}} = 405$  nm. #Indicate imperfect solvent subtraction.

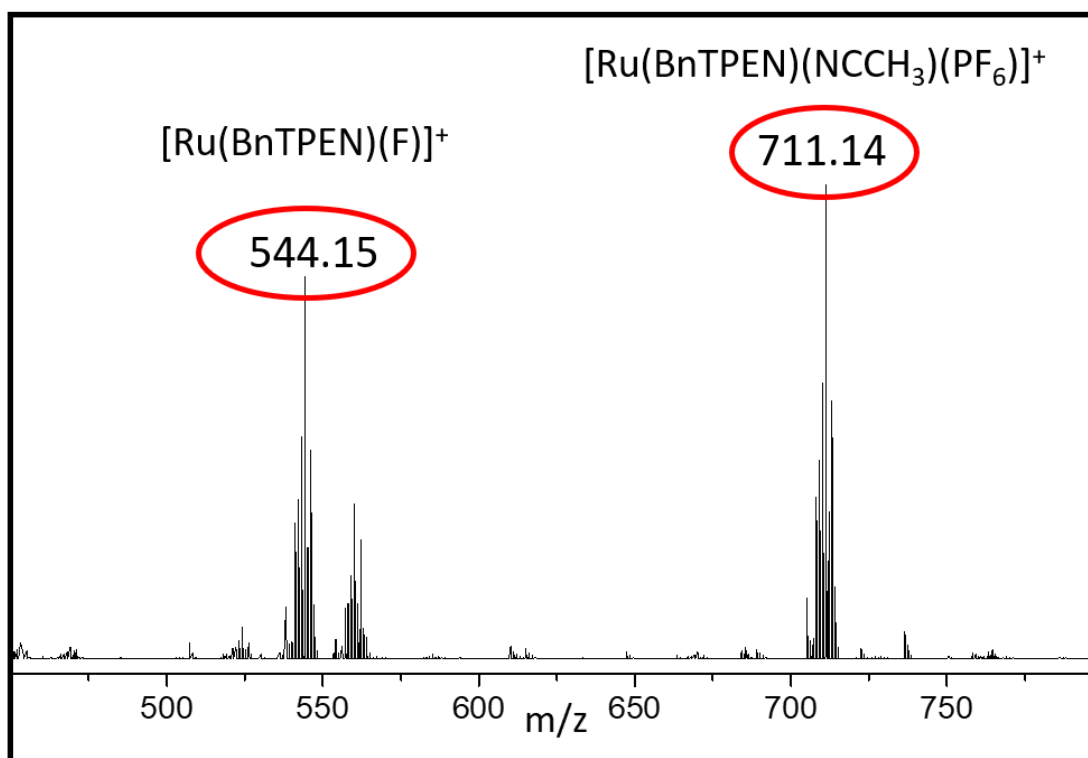

**Figure S5:** Positive mode ESI-mass spectrum of **1** in CH<sub>3</sub>CN.

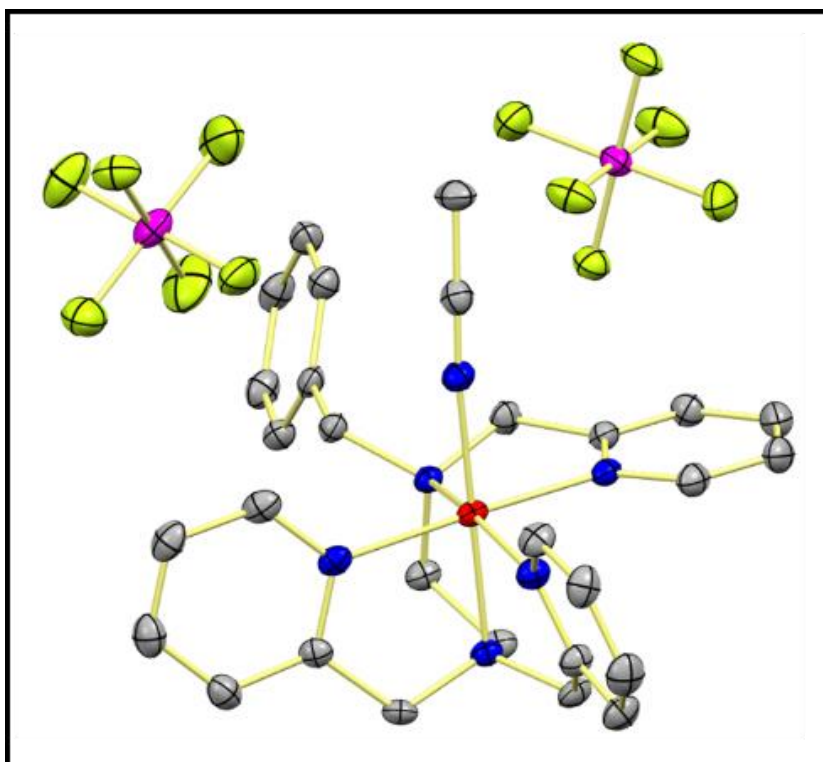

**Figure S6:** X-ray crystal structure of  $[\text{Ru}^{\text{II}}(\text{BnTPEN})(\text{NCCH}_3)](\text{PF}_6)_2$  (**1**). Hydrogen atoms were omitted for clarity.

**Table S1:** Crystal data and structure refinement of **1**.

|                                    |                                                                        |
|------------------------------------|------------------------------------------------------------------------|
| Empirical formula                  | $\text{C}_{29}\text{H}_{32}\text{F}_{12}\text{N}_6\text{P}_2\text{Ru}$ |
| Formula weight                     | 855.61                                                                 |
| Temperature/K                      | 100                                                                    |
| Crystal system                     | orthorhombic                                                           |
| Space group                        | Pbca                                                                   |
| $a/\text{\AA}$                     | 17.8918(13)                                                            |
| $b/\text{\AA}$                     | 18.6494(14)                                                            |
| $c/\text{\AA}$                     | 19.6329(15)                                                            |
| $\alpha/^\circ$                    | 90                                                                     |
| $\beta/^\circ$                     | 90                                                                     |
| $\gamma/^\circ$                    | 90                                                                     |
| Volume/ $\text{\AA}^3$             | 6550.9(8)                                                              |
| Z                                  | 8                                                                      |
| $\rho_{\text{calc}}/\text{g/cm}^3$ | 1.735                                                                  |
| $\mu/\text{mm}^{-1}$               | 0.678                                                                  |
| F(000)                             | 3440.0                                                                 |

|                                             |                                                               |
|---------------------------------------------|---------------------------------------------------------------|
| Crystal size/mm <sup>3</sup>                | 0.2 × 0.18 × 0.16                                             |
| Radiation                                   | MoK $\alpha$ ( $\lambda$ = 0.71073)                           |
| 2 $\theta$ range for data collection/°      | 5.346 to 56.608                                               |
| Index ranges                                | -23 ≤ h ≤ 23, -24 ≤ k ≤ 24, -26 ≤ l ≤ 26                      |
| Reflections collected                       | 93737                                                         |
| Independent reflections                     | 8125 [R <sub>int</sub> = 0.0807, R <sub>sigma</sub> = 0.0380] |
| Data/restraints/parameters                  | 8125/0/452                                                    |
| Goodness-of-fit on F <sup>2</sup>           | 1.075                                                         |
| Final R indexes [I ≥ 2 $\sigma$ (I)]        | R <sub>1</sub> = 0.0451, wR <sub>2</sub> = 0.0822             |
| Final R indexes [all data]                  | R <sub>1</sub> = 0.0689, wR <sub>2</sub> = 0.0937             |
| Largest diff. peak/hole / e Å <sup>-3</sup> | 0.82/-0.62                                                    |

**Table S2:** Selected Bond lengths (Å) of **1** and bond distance comparison with [Ru<sup>II</sup>(TPA)(NCCH<sub>3</sub>)<sub>2</sub>](PF<sub>6</sub>)<sub>2</sub> and [Ru<sup>II</sup>(N4Py)(OH<sub>2</sub>)](PF<sub>6</sub>)<sub>2</sub>.<sup>2, 3</sup>

|                       | <b>1</b>                         | [Ru <sup>II</sup> (TPA)(NCCH <sub>3</sub> ) <sub>2</sub> ](PF <sub>6</sub> ) <sub>2</sub> <sup>a</sup> | [Ru <sup>II</sup> (N4Py)(OH <sub>2</sub> )](PF <sub>6</sub> ) <sub>2</sub> <sup>b</sup> |
|-----------------------|----------------------------------|--------------------------------------------------------------------------------------------------------|-----------------------------------------------------------------------------------------|
| <b>Atom</b>           | <b>Length/Å</b>                  | <b>Length/Å</b>                                                                                        | <b>Length/Å</b>                                                                         |
| Ru-N <sub>py</sub>    | 2.067(3)<br>2.060(3)<br>2.071(3) | 2.062(4)<br>2.071(4)<br>2.056(4)                                                                       | 2.057(4)<br>2.052(4)<br>2.061(4)<br>2.060(5)                                            |
| Ru-N <sub>amine</sub> | 2.069(3)<br>2.141(2)             | 2.053(4)                                                                                               | 1.967(5)                                                                                |
| Ru-N <sub>MeCN</sub>  | 2.030(3)                         | 2.031(5)<br>2.037(5)                                                                                   |                                                                                         |
| Ru-O <sub>water</sub> |                                  |                                                                                                        | 2.172(5)                                                                                |
| Ru-N <sub>Avg</sub>   | 2.073                            | 2.051                                                                                                  | 2.039                                                                                   |

<sup>a</sup> TPA: tris(2-pyridylmethyl)amine;

<sup>b</sup> N4Py: N,N-bis(2-pyridyl-methyl)-N-bis(2-pyridyl)methylamine)

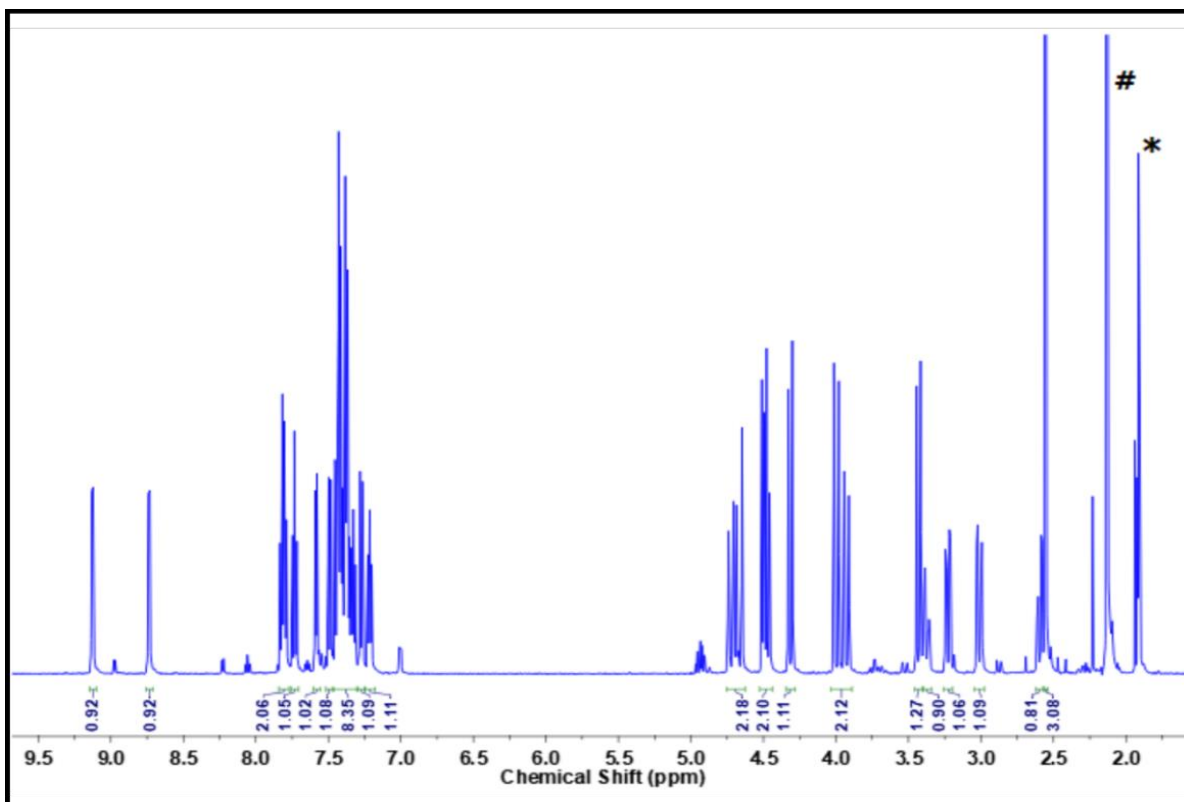

**Figure S7:** <sup>1</sup>H NMR spectrum of **1** in CD<sub>3</sub>CN at 500 MHz. (\*peak for solvent, #peak for H<sub>2</sub>O)

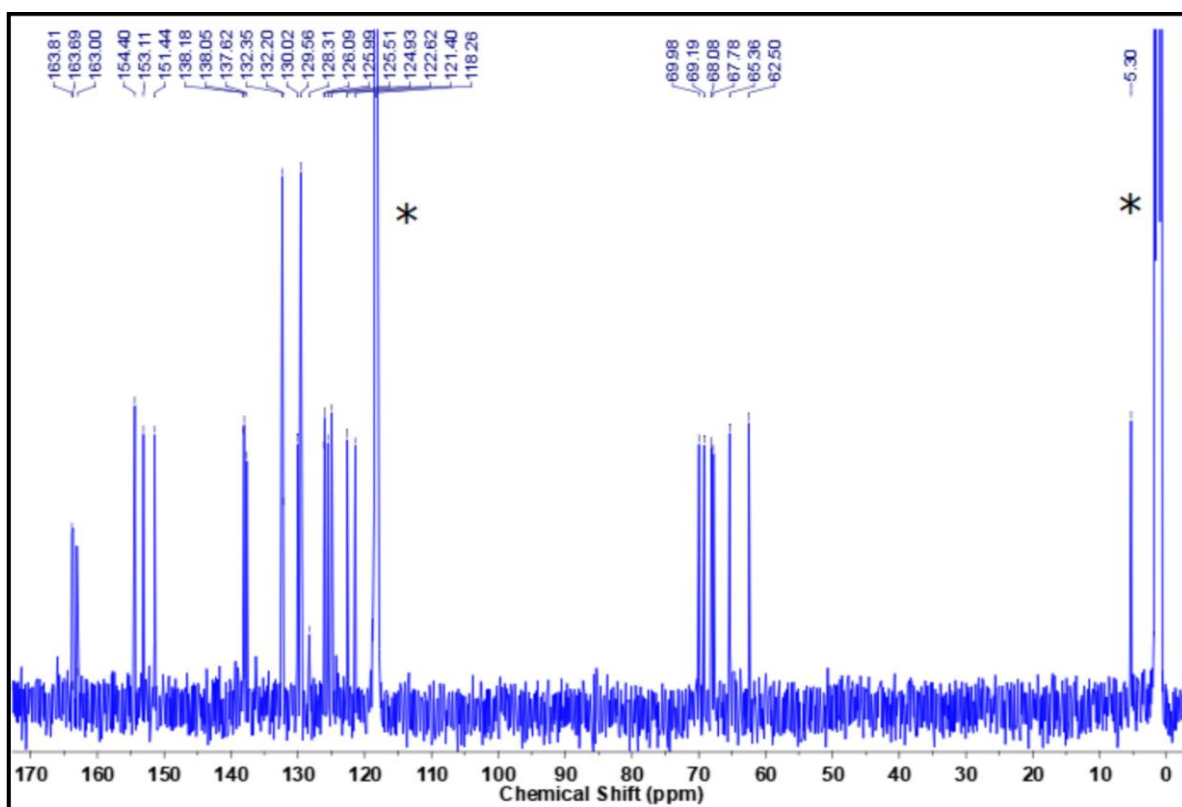

Figure S8:  $^{13}\text{C}\{^1\text{H}\}$  NMR spectrum of **1** in  $\text{CD}_3\text{CN}$  at 125 MHz. (\*peak for solvent)



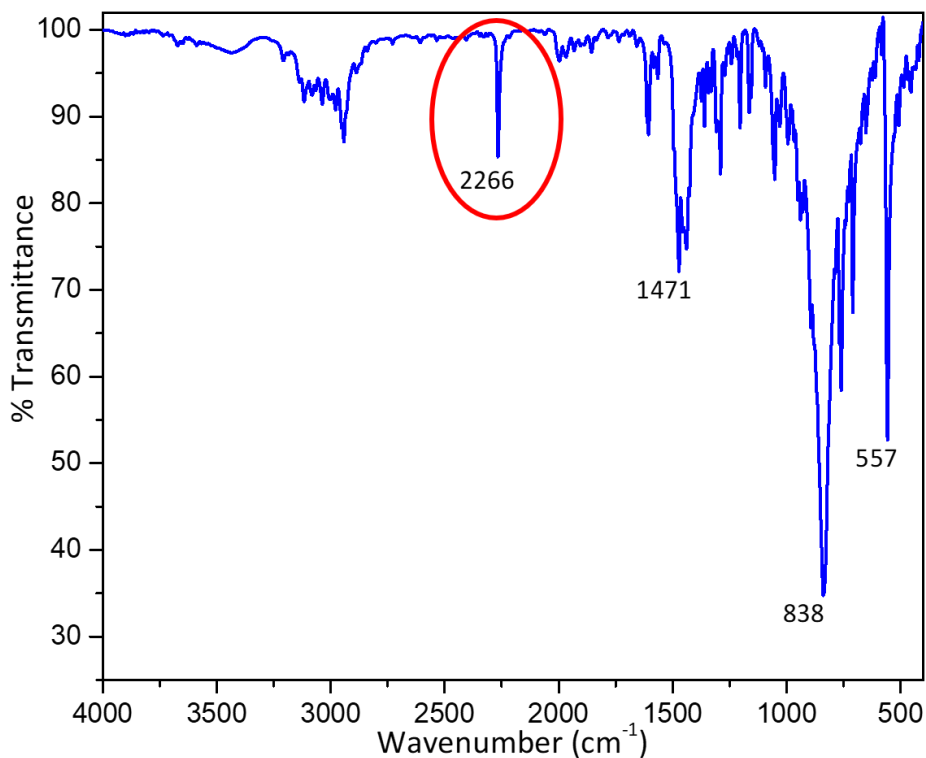

**Figure S9:** Solid-state FT-IR spectrum of **1** on KBr pellet. The band at 2266  $\text{cm}^{-1}$  is originated from the bound acetonitrile molecule to **1**.

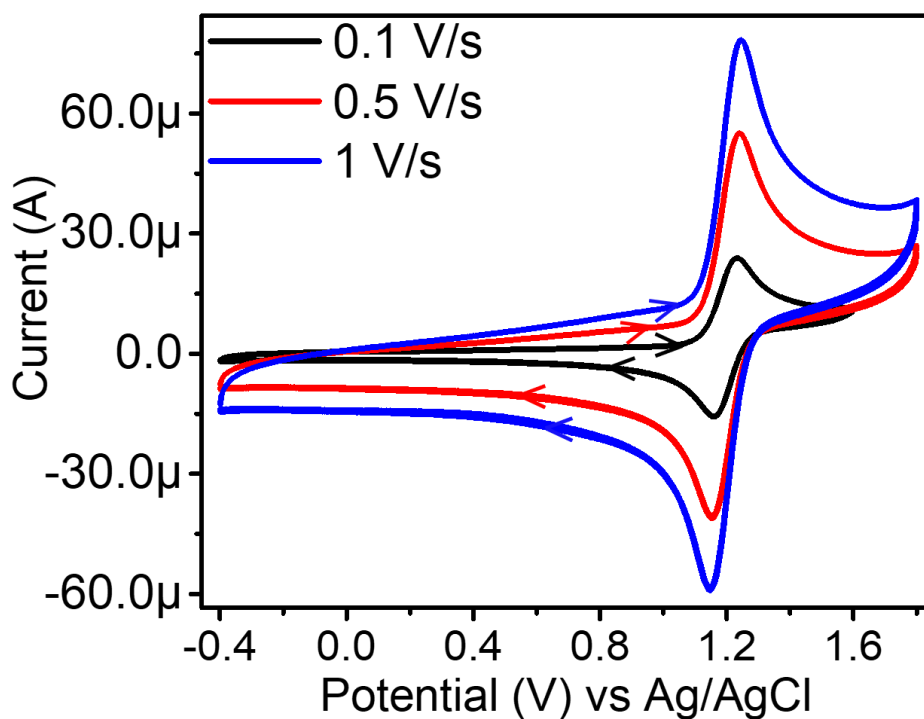

**Figure S10:** Scan rate (in V/s) dependent cyclic voltammograms of **1** in  $\text{CH}_3\text{CN}$  in the positive direction. Starting point of each scan started at open circuit potential (typically, between 0 to 0.3 V).

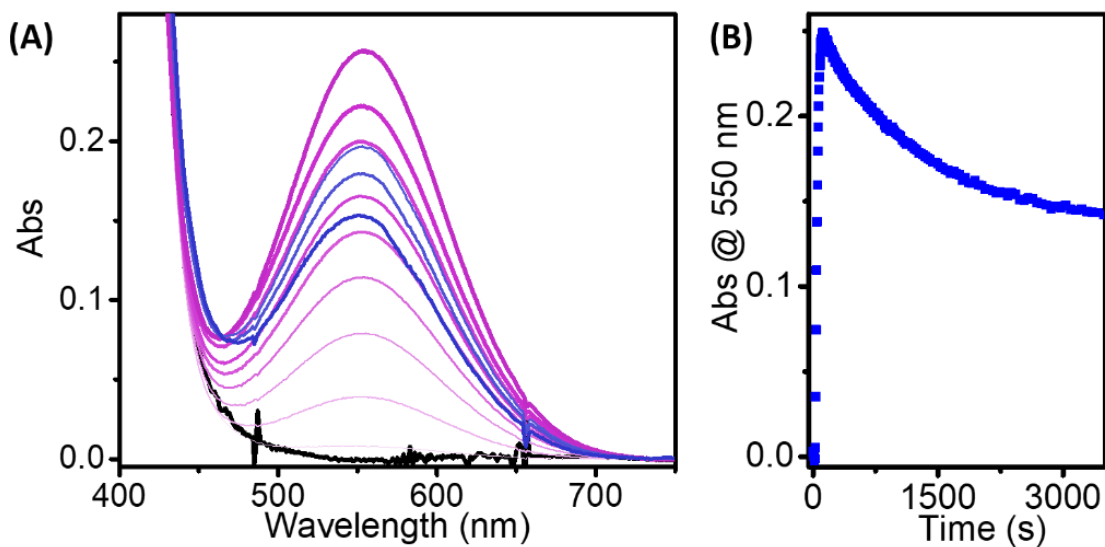

**Figure S11:** (A) Time-dependent UV/Vis absorption spectral changes upon the reaction of **1** (0.5 mM in CH<sub>3</sub>CN) with 10 eq. HClO<sub>4</sub> and 10 eq. aqueous NaOCl at room temperature. (B) Corresponding changes in the absorption at 550 nm over time in seconds.

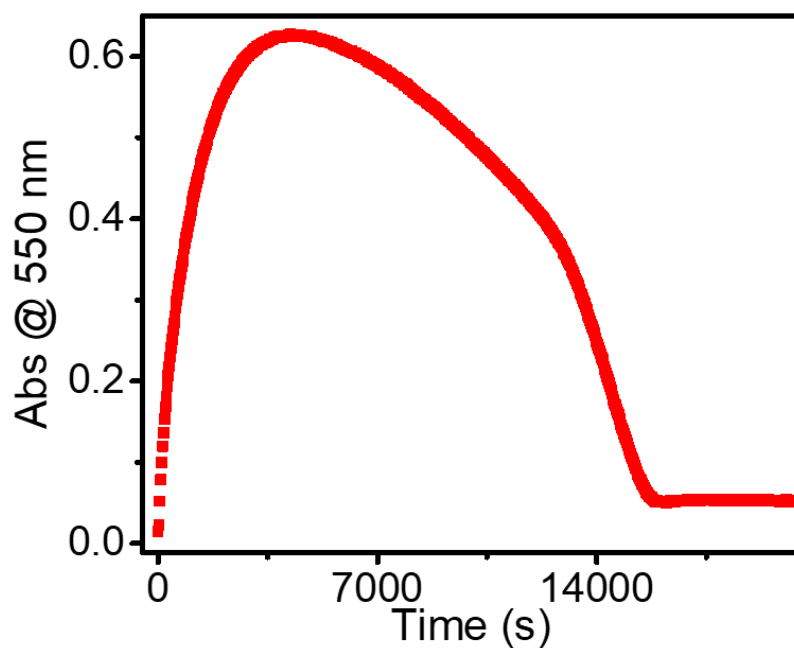

**Figure S12:** Time-dependent absorption changes at 550 nm of **2**, generated upon the reaction of **1** (0.5 mM) with 10 eq. HClO<sub>4</sub> and 10 eq. aqueous NaOCl in 3:1 CH<sub>3</sub>CN:H<sub>2</sub>O at RT. The intermediate **2** persisted for 4.5 h under the conditions employed.

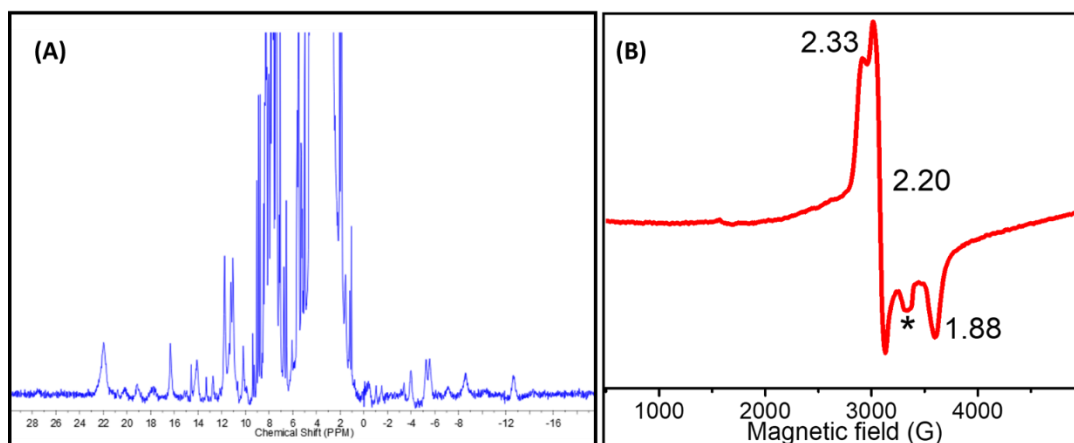

**Figure S13:** (A)  $^1\text{H}$  NMR spectrum of **2** in (3:1)  $\text{CD}_3\text{CN}:\text{D}_2\text{O}$  at 500 MHz. Condition to generate **2**: 70 mM of **1** in 3:1  $\text{CD}_3\text{CN}:\text{D}_2\text{O}$  with 10 eq.  $\text{HClO}_4$  and 10 eq. aqueous  $\text{NaOCl}$ . (B) Full-scale X-band EPR spectrum of **2** generated by the reaction of 0.5 mM **1** with 10 eq.  $\text{HClO}_4$  and 10 eq. aqueous  $\text{NaOCl}$  in 3:1  $\text{CH}_3\text{CN}:\text{H}_2\text{O}$  at 120 K. \* Artifact from the cavity.

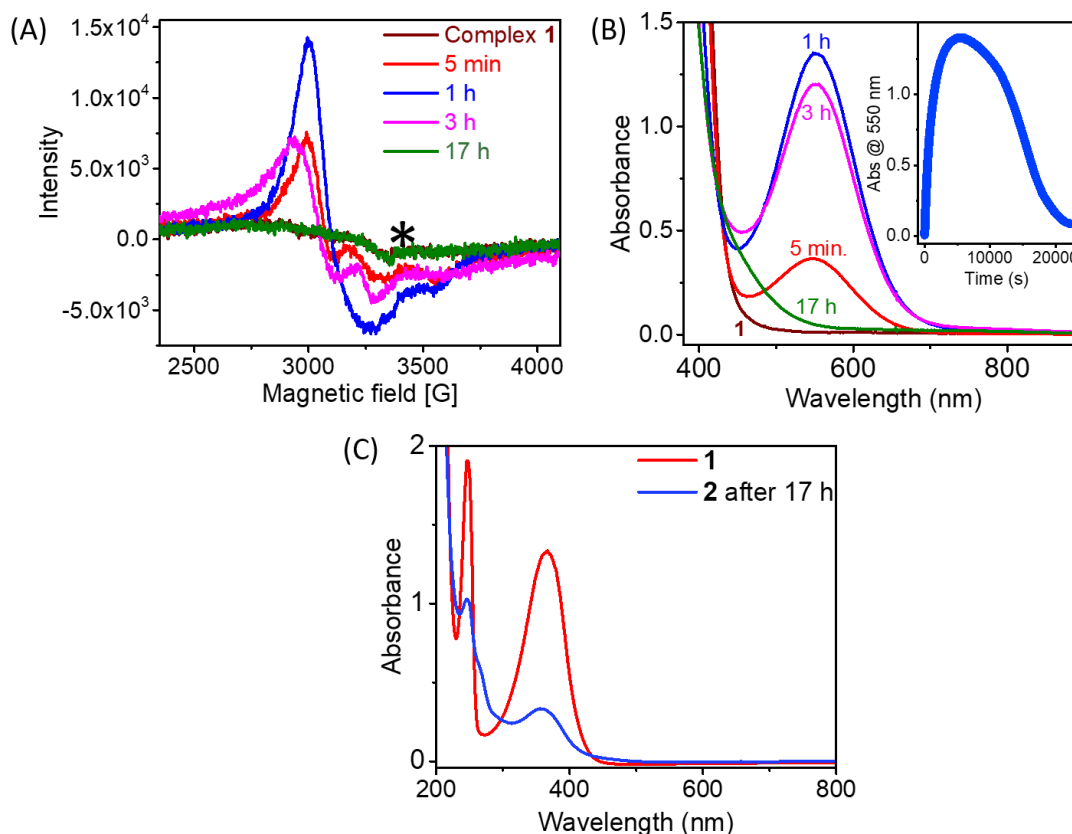

**Figure S14:** (A) Reaction progress for the formation and decay of **2** followed by X-band EPR spectroscopy obtained at 120 K. Modulation amplitude 1.98 G; Modulation frequency 100 KHz, and Attenuation 10 dB. \*Artifact from the cavity. (B) The corresponding UV/Vis absorption spectra of the samples used to run the EPR data. Inset: Absorption changes followed at 560 nm of **2**. Conditions: 1 mM **1** in 3:1  $\text{CH}_3\text{CN}:\text{H}_2\text{O}$ , 10 eq.  $\text{HClO}_4$ , and 10 eq. aqueous  $\text{NaOCl}$ . (C) UV/Vis absorption spectral comparison of the decayed sample (17 h) of **2** and **1** (in 1 mm path length cuvette).

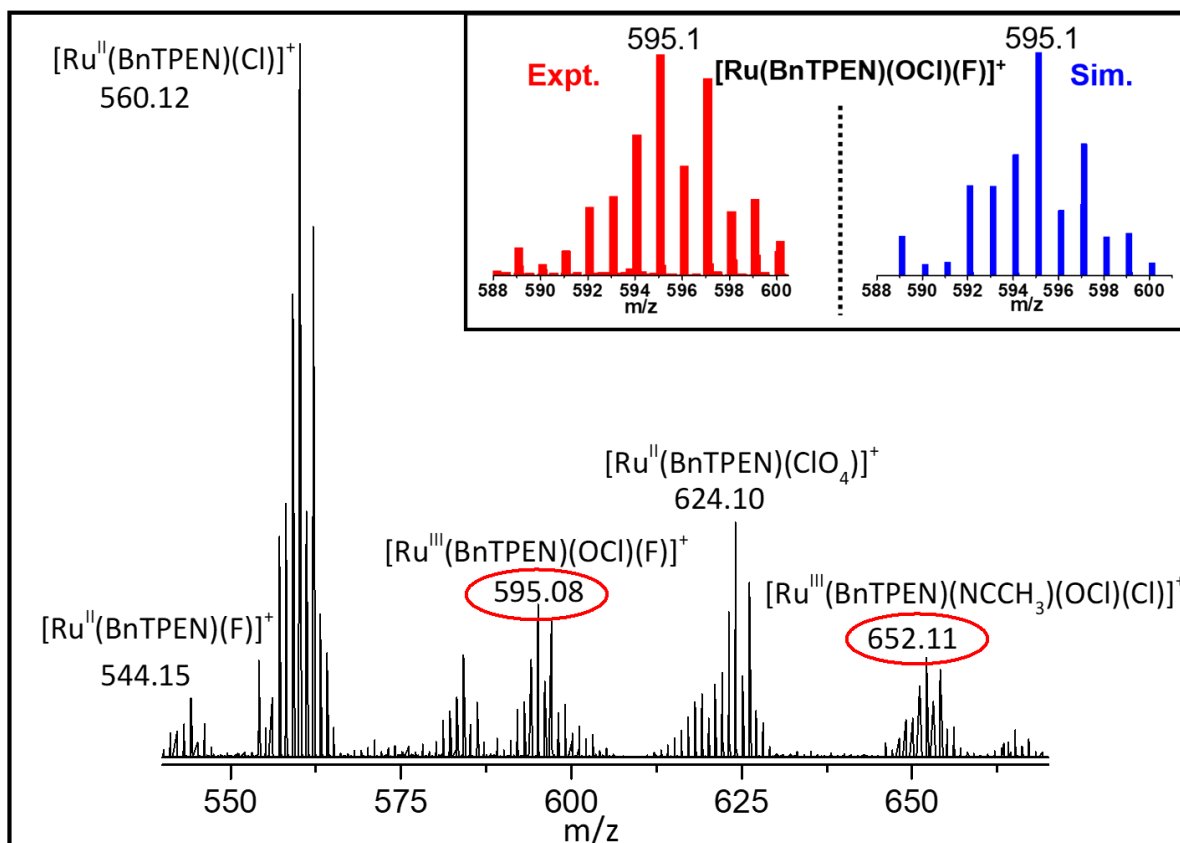

**Figure S15:** ESI-mass spectrum of **2**, generated upon the reaction of **1** with 10 eq.  $\text{HClO}_4$  and 10 eq. aqueous  $\text{NaOCl}$  in 3:1  $\text{CH}_3\text{CN}:\text{H}_2\text{O}$  at room temperature. Inset: ESI-mass spectrum experimental (left) and simulated (right) of **2**, formulated as  $[\text{Ru}(\text{BnTPEN})(\text{OCl})(\text{F})]^+$  (m/z: 595.1).

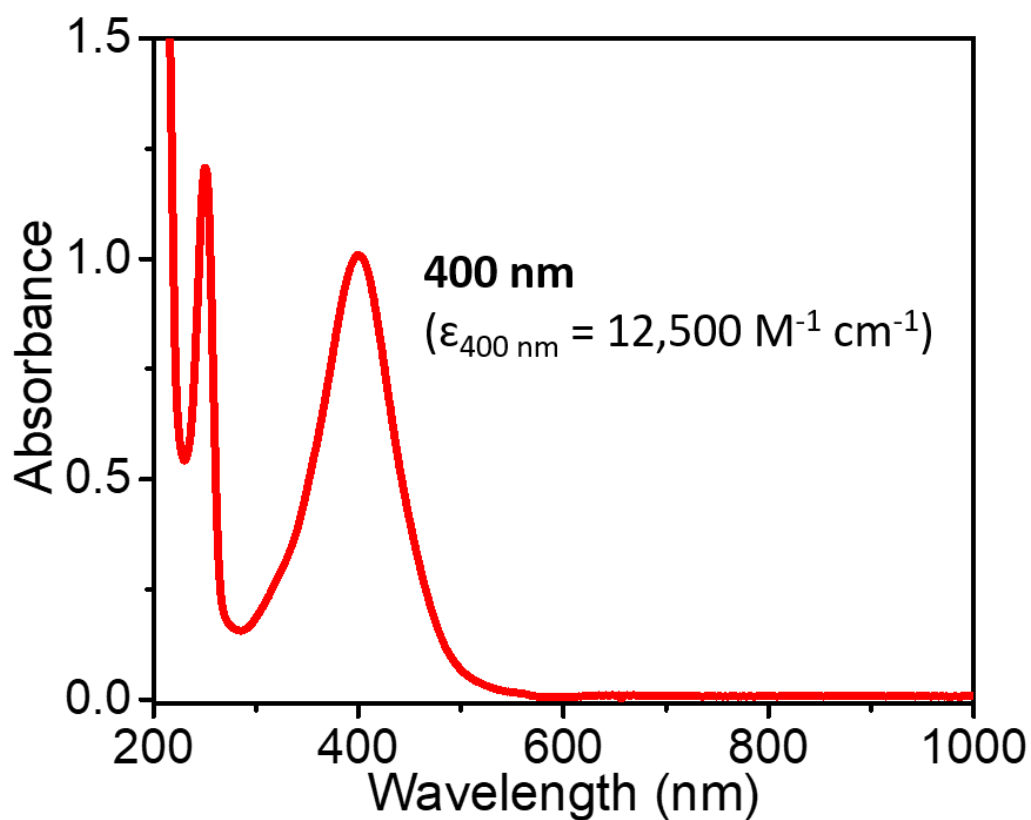

**Figure S16:** UV/Vis absorption spectrum of 0.08 mM  $[\text{Ru}^{\text{II}}(\text{BnTPEN})(\text{Cl})](\text{Cl})$  (**3**) in  $\text{CH}_3\text{CN}$  at room temperature.

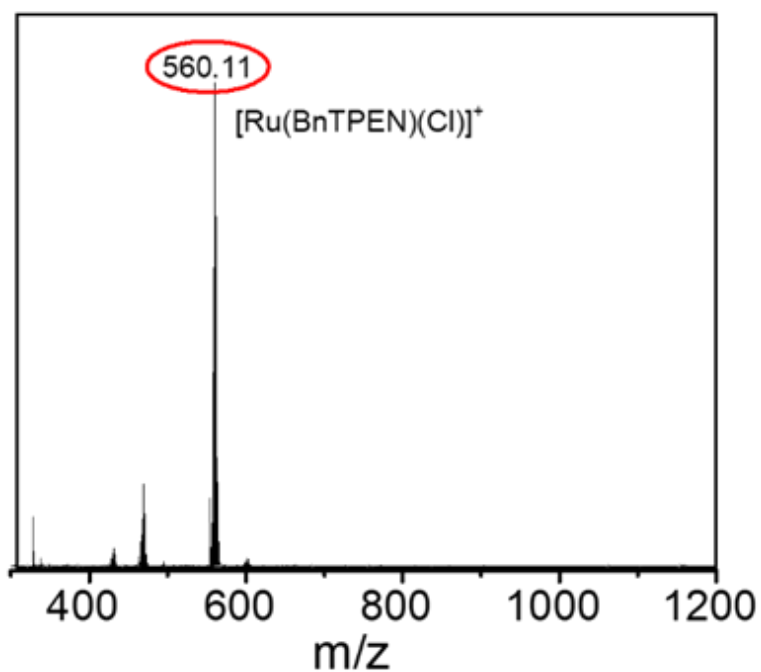

**Figure S17:** Positive mode ESI-mass spectrum of **3** in  $\text{CH}_3\text{CN}$ .

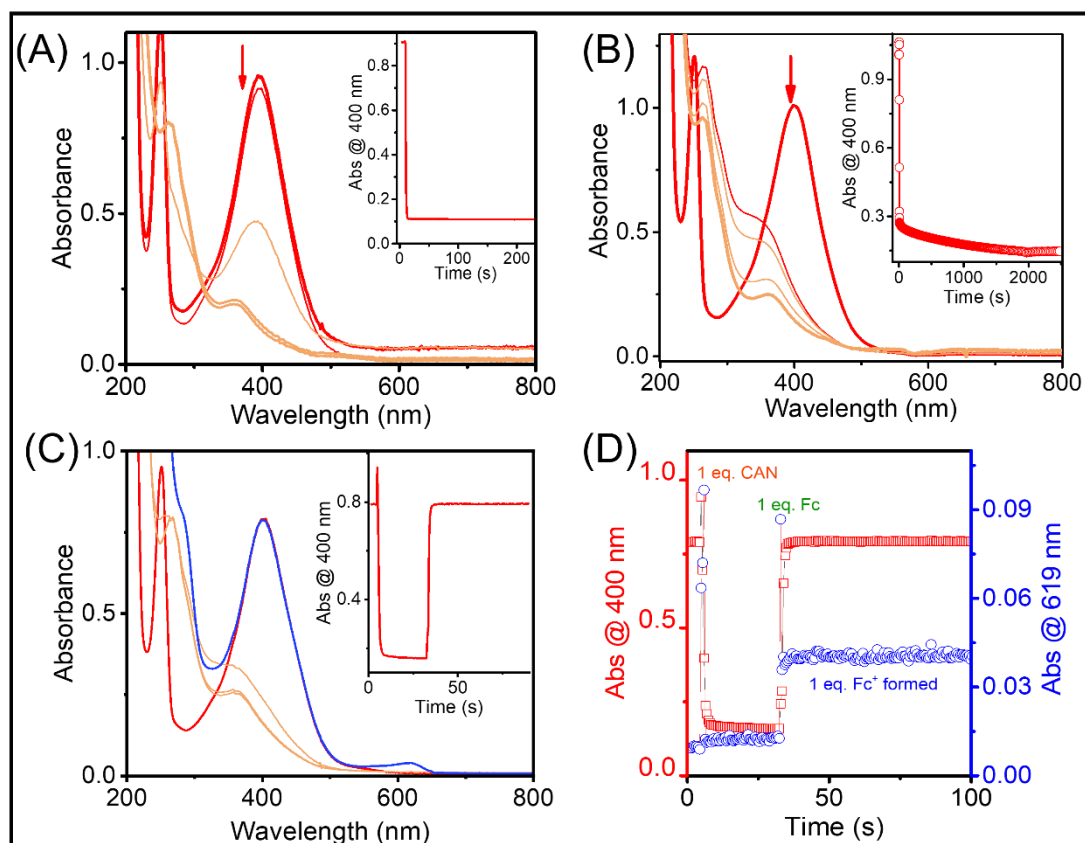

**Figure S18:** Time-dependent UV/Vis absorption spectral changes observed (A) upon the reaction of  $[\text{Ru}^{\text{II}}(\text{BnTPEN})(\text{Cl})](\text{Cl})$  (0.08 mM in 3:1  $\text{CH}_3\text{CN}:\text{H}_2\text{O}$ ) with 10 eq.  $\text{HClO}_4$  and 10 eq. aqueous  $\text{NaOCl}$  at room temperature. Inset: the corresponding changes in the absorption at 400 nm over time in seconds (B) upon the reaction of  $[\text{Ru}^{\text{II}}(\text{BnTPEN})(\text{Cl})](\text{Cl})$  (0.08 mM in  $\text{CH}_3\text{CN}$ ) with 1 eq. ammonium ceric nitrate at room temperature. Inset: the corresponding changes in the absorption at 400 nm over time in seconds. (C) Time-dependent UV/Vis absorption spectral changes upon the reaction of  $[\text{Ru}^{\text{II}}(\text{BnTPEN})(\text{Cl})](\text{Cl})$  (0.08 mM in  $\text{CH}_3\text{CN}$ ) with 1 eq. ammonium ceric nitrate (CAN) followed by the addition of 1 eq. ferrocene (Fc) at room temperature. Inset: the corresponding changes in the absorption at 400 nm over time in seconds. (D) Corresponding changes in the absorption at 400 nm for **3** and 619 nm for ferrocenium over time in seconds.

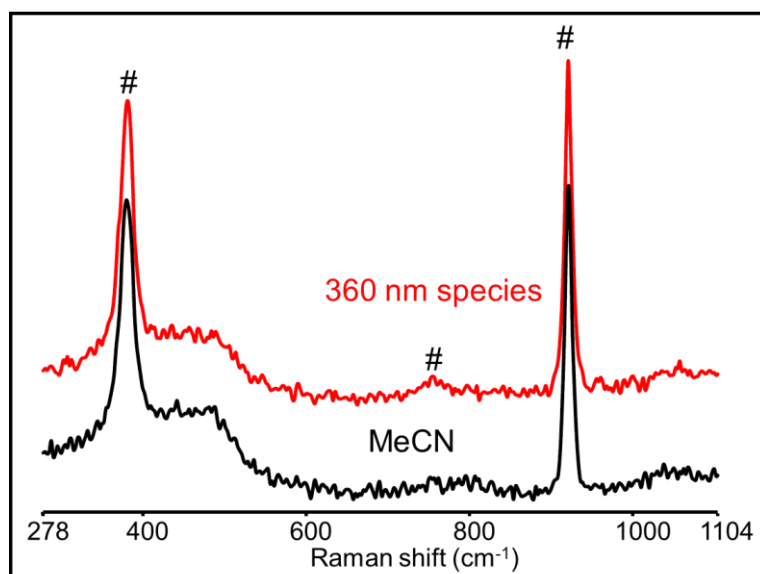

**Figure S19:** Raman spectrum of 360 nm species at  $\lambda_{\text{exc}}$  532 nm generated by the reaction of [Ru(BnTPEN)(Cl)]Cl (1 mM) with 1 eq. CAN in acetonitrile at room temperature (Red); Raman spectrum of the solvent acetonitrile (Black). # Indicates solvent peaks.

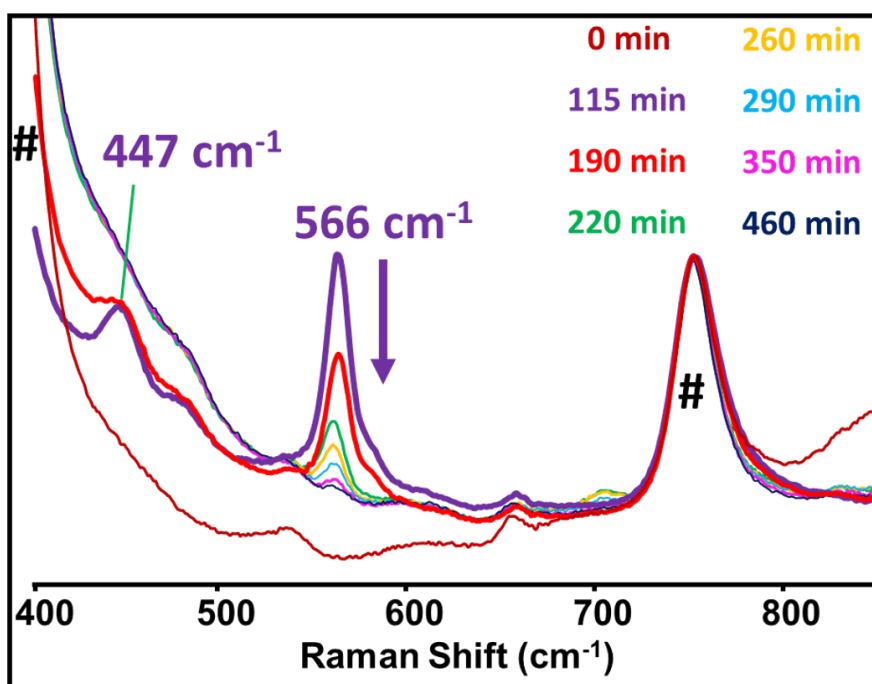

**Figure S20:** Time dependent resonance Raman spectra (at  $\lambda_{\text{exc}}$  532 nm) of **2** in 3:1 CH<sub>3</sub>CN:H<sub>2</sub>O generated by the addition of 10 eq. HClO<sub>4</sub> and 10 eq. aqueous NaOCl to **1** at room temperature. # Indicates solvent peaks.

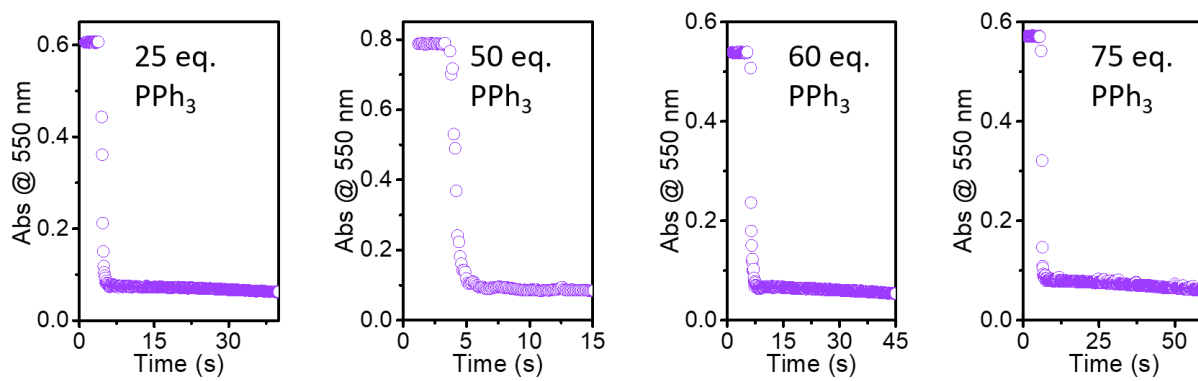

**Figure S21:** Decay of **2** followed at 550 nm in presence of various concentrations of PPh<sub>3</sub> in 3:1 CH<sub>3</sub>CN: H<sub>2</sub>O at 25 °C. Conditions to generate **2**: 0.5 mM **1** in 3:1 CH<sub>3</sub>CN:H<sub>2</sub>O + 10 eq. HClO<sub>4</sub> and 10 eq. aqueous NaOCl. Note: This reaction is too fast to reliably measure the rate under the conditions employed.



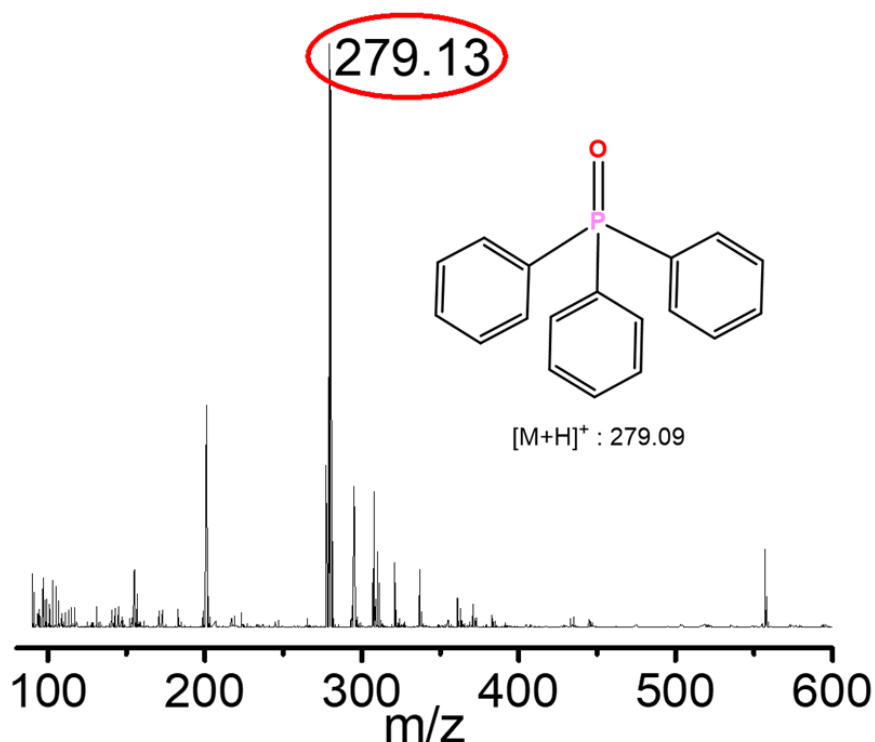

**Figure S22:** Product analysis of the reaction of **2** with 100 eq.  $PPh_3$  by APCI-MS. Conditions to generate **2**: 2.0 mM **1** in 3:1  $CH_3CN:H_2O$  + 10 eq.  $HClO_4$  and 10 eq. aqueous  $NaOCl$ .

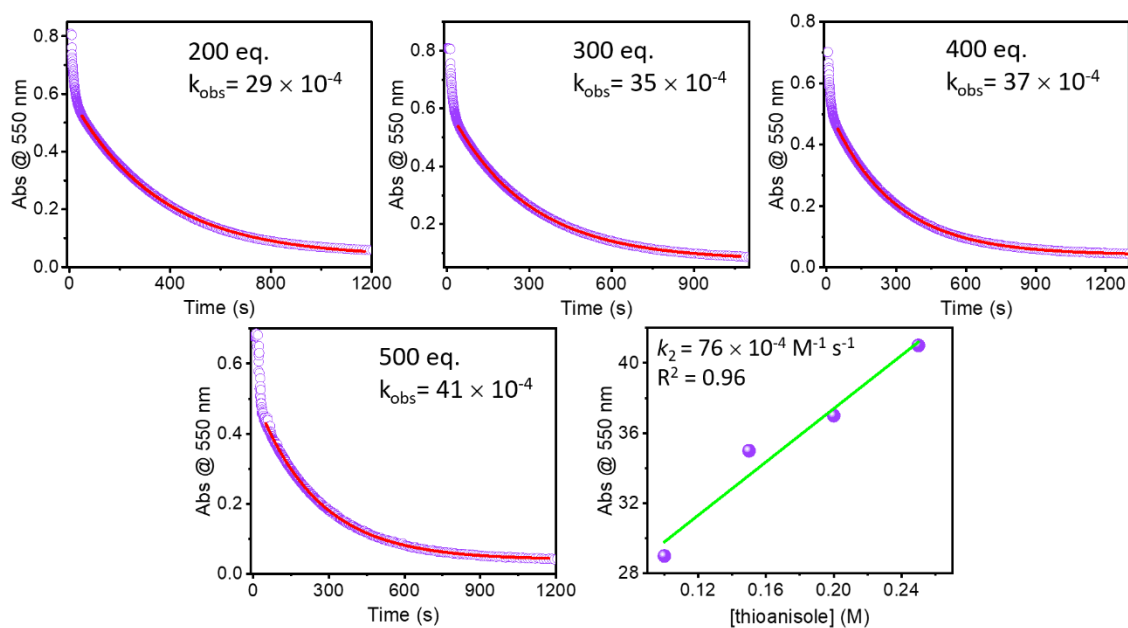

**Figure S23:** Decay of **2** followed at 550 nm in presence of various concentrations of thioanisole to give pseudo-first-order rate constants ( $k_{obs}$ ) in 3:1  $CH_3CN:H_2O$  at 25 °C. The plot of  $k_{obs}$  against the concentrations of thioanisole to obtain a second-order-rate constant ( $k_2 = 76 \times 10^{-4} M^{-1} s^{-1}$ ). Conditions to generate **2**: 0.5 mM **1** in 3:1  $CH_3CN:H_2O$  + 10 eq.  $HClO_4$  and 10 eq. aqueous  $NaOCl$ .

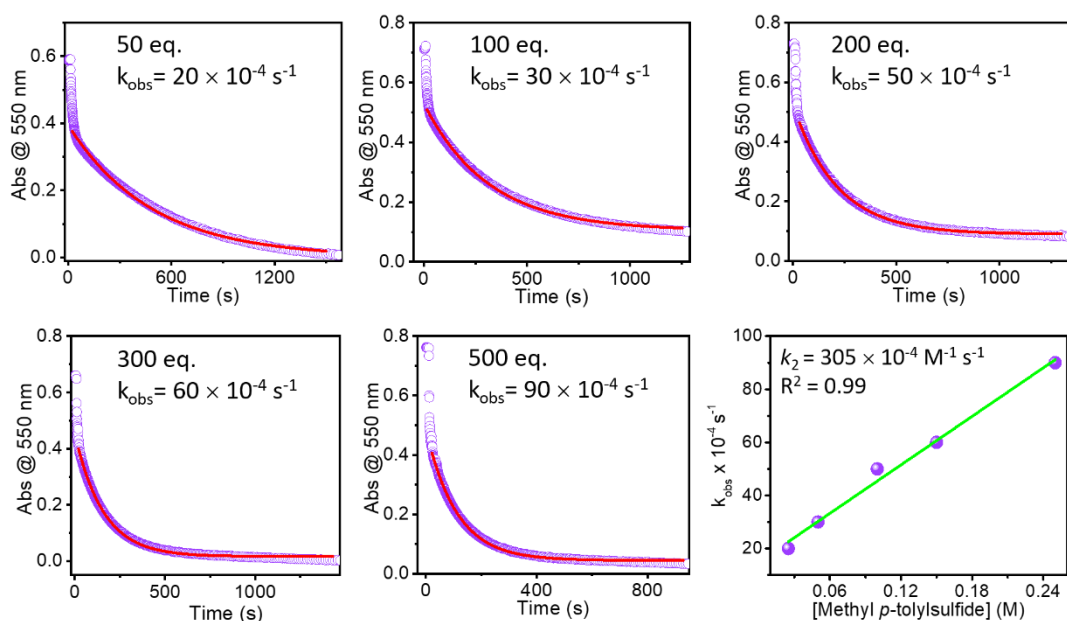

**Figure S24:** Decay of **2** followed at 550 nm in presence of various concentrations of methyl *p*-tolylsulfide to give pseudo-first-order rate constants ( $k_{\text{obs}}$ ) in 3:1  $\text{CH}_3\text{CN}:\text{H}_2\text{O}$  at 25 °C. The plot of  $k_{\text{obs}}$  against the concentrations of methyl *p*-tolylsulfide to obtain a second-order-rate constant ( $k_2 = 305 \times 10^{-4} \text{ M}^{-1} \text{ s}^{-1}$ ). Conditions to generate **2**: 0.5 mM **1** in 3:1  $\text{CH}_3\text{CN}:\text{H}_2\text{O}$  + 10 eq.  $\text{HClO}_4$  and 10 eq. aqueous  $\text{NaOCl}$ .

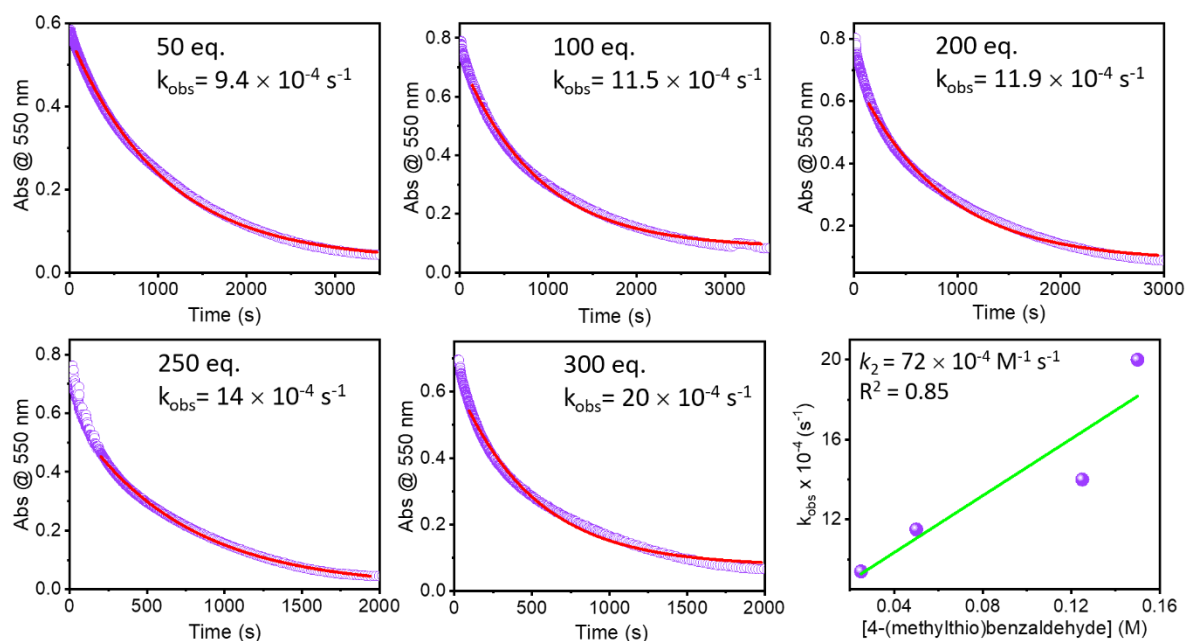

**Figure S25:** Decay of **2** followed at 550 nm in presence of various concentrations of 4-(methylthio)benzaldehyde to give pseudo-first-order rate constants ( $k_{\text{obs}}$ ) in 3:1  $\text{CH}_3\text{CN}:\text{H}_2\text{O}$  at 25 °C. The plot of  $k_{\text{obs}}$  against the concentrations of 4-(methylthio)benzaldehyde to obtain a second-order-rate constant ( $k_2 = 72 \times 10^{-4} \text{ M}^{-1} \text{ s}^{-1}$ ). Conditions to generate **2**: 0.5 mM **1** in 3:1  $\text{CH}_3\text{CN}:\text{H}_2\text{O}$  + 10 eq.  $\text{HClO}_4$  and 10 eq. aqueous  $\text{NaOCl}$ .

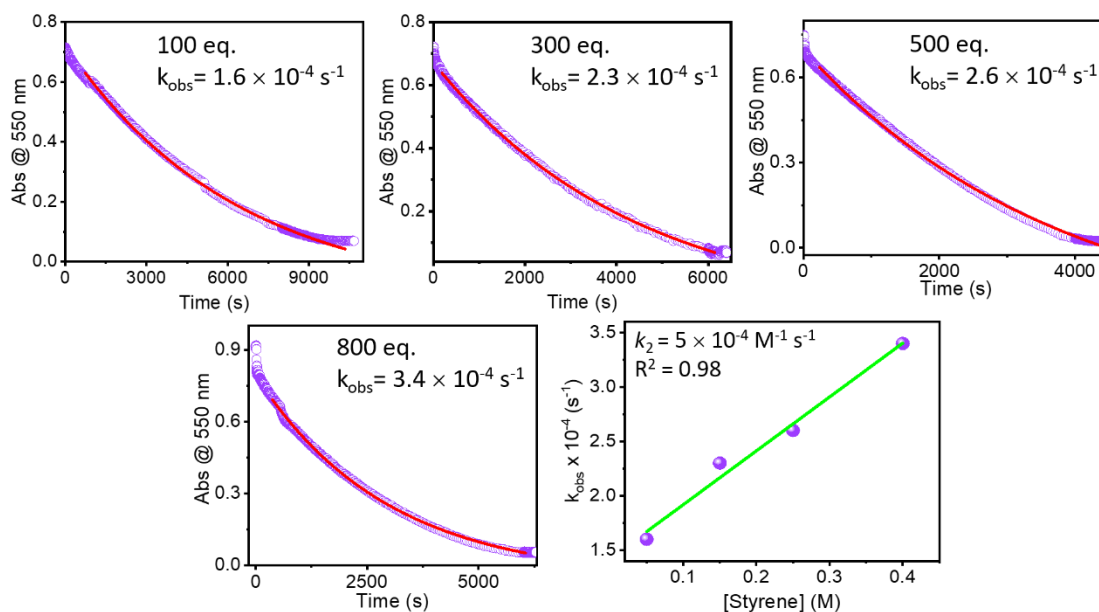

**Figure S26:** Decay of **2** followed at 550 nm in presence of various concentrations of styrene to give pseudo-first-order rate constants ( $k_{\text{obs}}$ ) in 3:1  $\text{CH}_3\text{CN}:\text{H}_2\text{O}$  at 25 °C. The plot of  $k_{\text{obs}}$  against the concentrations of styrene to obtain a second-order-rate constant ( $k_2 = 5 \times 10^{-4} \text{ M}^{-1}\text{s}^{-1}$ ). Conditions to generate **2**: 0.5 mM **1** in 3:1  $\text{CH}_3\text{CN}:\text{H}_2\text{O}$  + 10 eq.  $\text{HClO}_4$  and 10 eq. aqueous  $\text{NaOCl}$ .

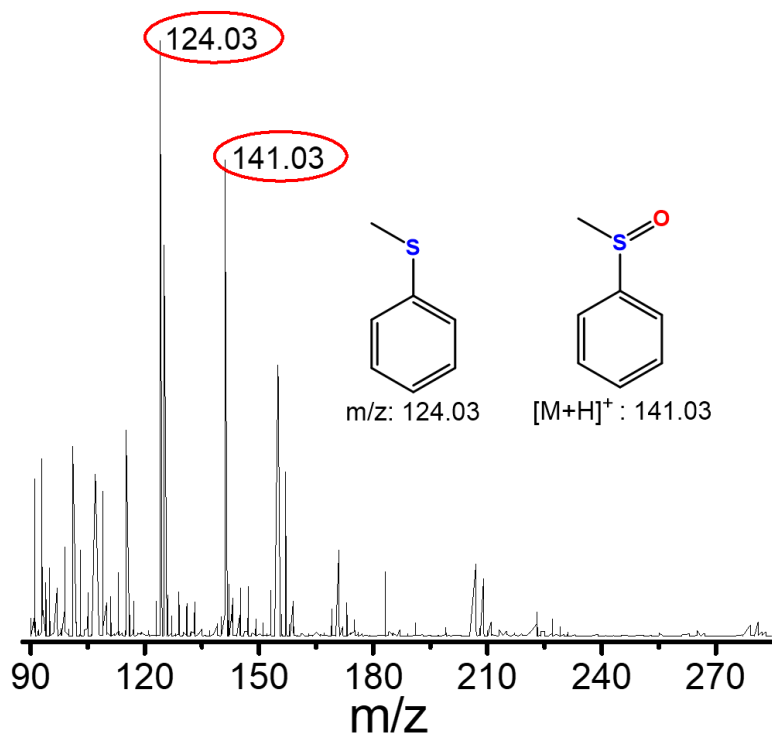

**Figure S27:** Product analysis of the reaction of **2** with 100 eq thioanisole by APCI-MS. Conditions to generate **2**: 2.0 mM **1** in 3:1 CH<sub>3</sub>CN:H<sub>2</sub>O + 10 eq. HClO<sub>4</sub> and 10 eq. aqueous NaOCl.

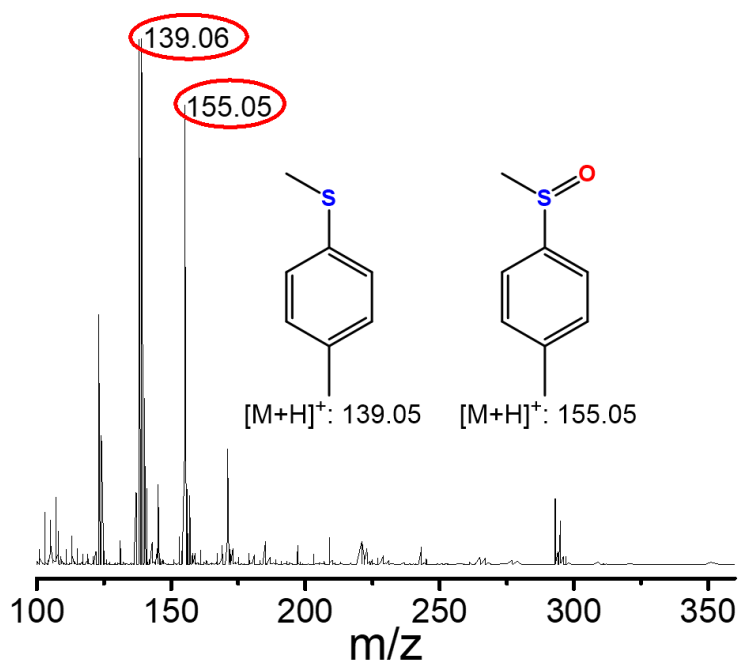

**Figure S28:** Product analysis of the reaction of **2** with 100 eq. methyl *p*-tolylsulfide by APCI-MS. Conditions to generate **2**: 2.0 mM **1** in 3:1 CH<sub>3</sub>CN:H<sub>2</sub>O + 10 eq. HClO<sub>4</sub> and 10 eq. aqueous NaOCl.

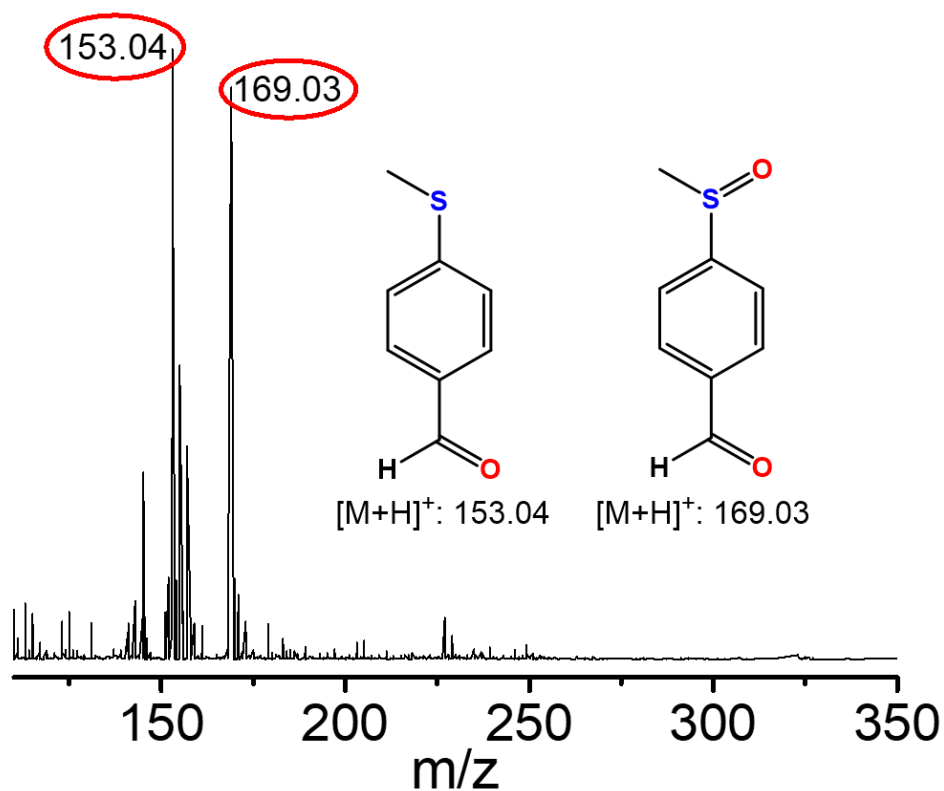

**Figure S29:** Product analysis of the reaction of **2** with 100 eq. 4-(methylthio)benzaldehyde by APCI-MS. Conditions to generate **2**: 2.0 mM **1** in 3:1  $\text{CH}_3\text{CN}:\text{H}_2\text{O}$  + 10 eq.  $\text{HClO}_4$  and 10 eq. aqueous  $\text{NaOCl}$ .

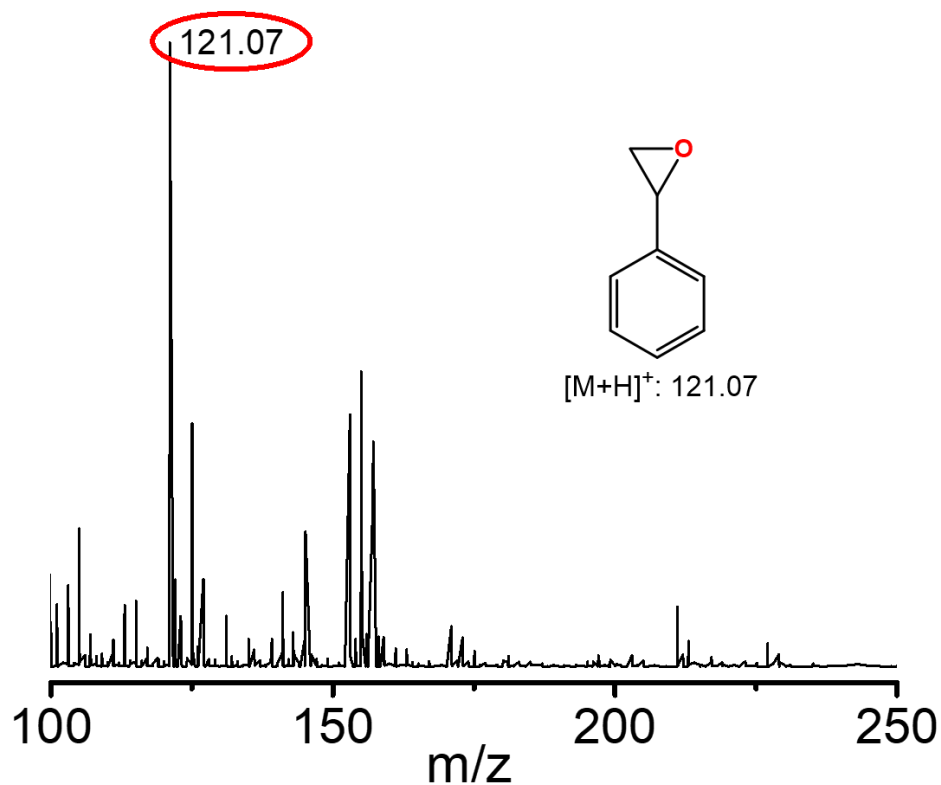

**Figure S30:** Product analysis of the reaction of **2** with 100 eq. styrene by APCI-MS. Conditions to generate **2**: 2.0 mM **1** in 3:1  $\text{CH}_3\text{CN}:\text{H}_2\text{O}$  + 10 eq.  $\text{HClO}_4$  and 10 eq. aqueous  $\text{NaOCl}$ .

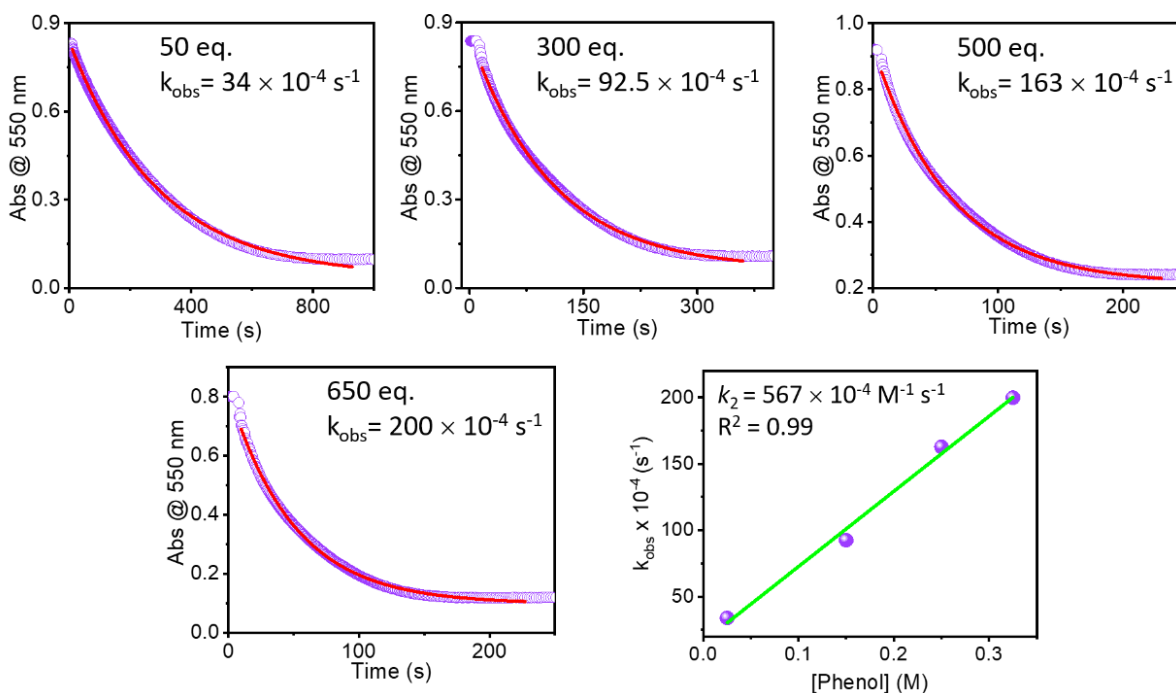

**Figure S31:** Decay of **2** followed at 550 nm in presence of various concentrations of phenol to give pseudo-first-order rate constants ( $k_{\text{obs}}$ ) in 3:1  $\text{CH}_3\text{CN}:\text{H}_2\text{O}$  at 25 °C. The plot of  $k_{\text{obs}}$  against the concentrations of phenol to obtain a second-order-rate constant ( $k_2 = 567 \times 10^{-4} \text{ M}^{-1}\text{s}^{-1}$ ). Conditions to generate **2**: 0.5 mM **1** in 3:1  $\text{CH}_3\text{CN}:\text{H}_2\text{O}$  + 10 eq.  $\text{HClO}_4$  and 10 eq. aqueous  $\text{NaOCl}$ .

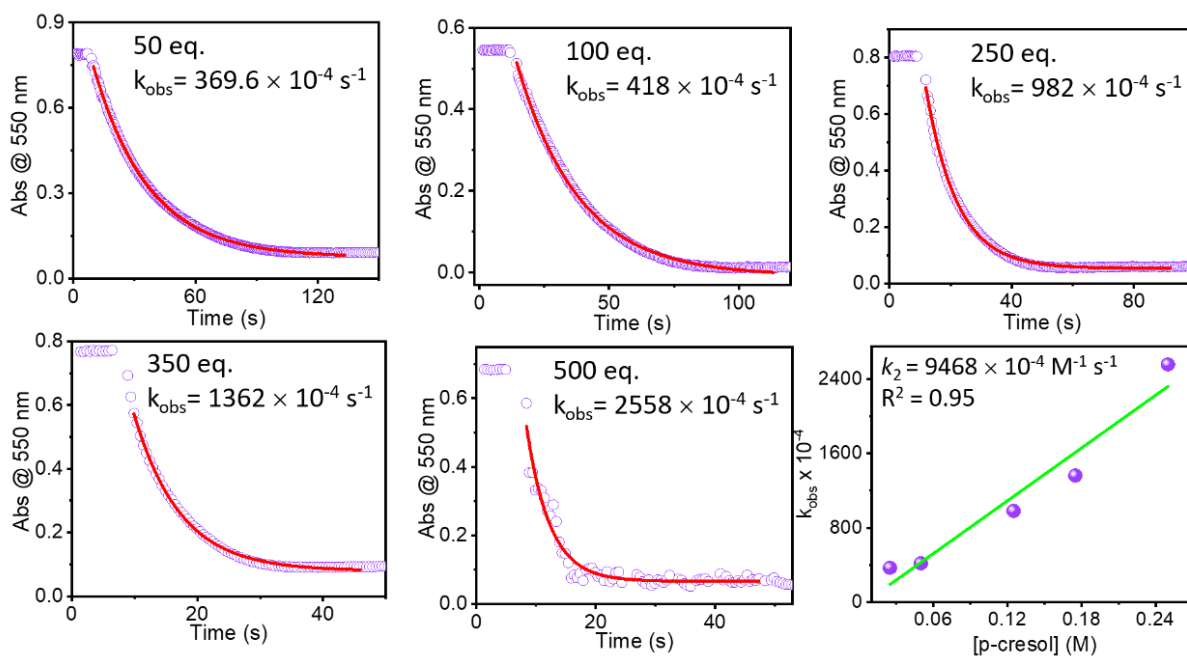

**Figure S32:** Decay of **2** followed at 550 nm in presence of various concentrations of *p*-cresol to give pseudo-first-order rate constants ( $k_{\text{obs}}$ ) in 3:1  $\text{CH}_3\text{CN}:\text{H}_2\text{O}$  at 25 °C. The plot of  $k_{\text{obs}}$  against the concentrations of *p*-cresol to obtain a second-order-rate constant ( $k_2 = 9468 \times 10^{-4} \text{ M}^{-1}\text{s}^{-1}$ ). Conditions to generate **2**: 0.5 mM **1** in 3:1  $\text{CH}_3\text{CN}:\text{H}_2\text{O}$  + 10 eq.  $\text{HClO}_4$  and 10 eq. aqueous  $\text{NaOCl}$ .

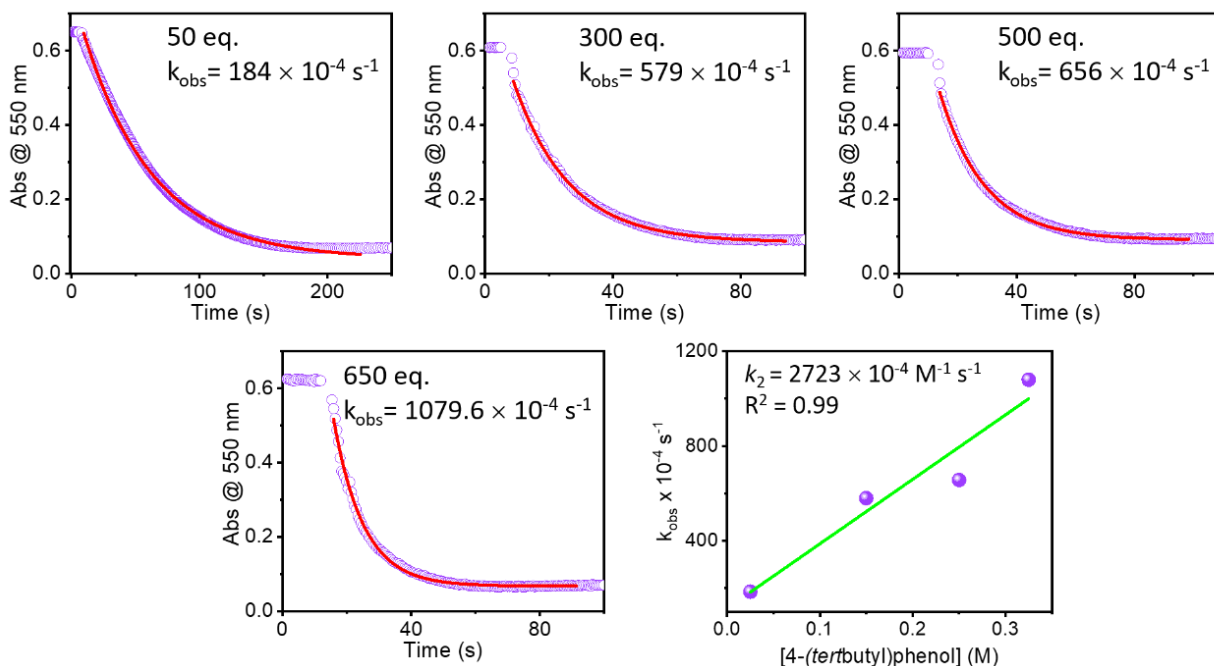

**Figure S33:** Decay of **2** followed at 550 nm in presence of various concentrations of 4-*tert*butylphenol to give pseudo-first-order rate constants ( $k_{\text{obs}}$ ) in 3:1  $\text{CH}_3\text{CN}:\text{H}_2\text{O}$  at 25 °C. The plot of  $k_{\text{obs}}$  against the concentrations of 4-*tert*butylphenol to obtain a second-order-rate constant ( $k_2 = 2723 \times 10^{-4} \text{ M}^{-1}\text{s}^{-1}$ ). Conditions to generate **2**: 0.5 mM **1** in 3:1  $\text{CH}_3\text{CN}:\text{H}_2\text{O}$  + 10 eq.  $\text{HClO}_4$  and 10 eq. aqueous  $\text{NaOCl}$ .

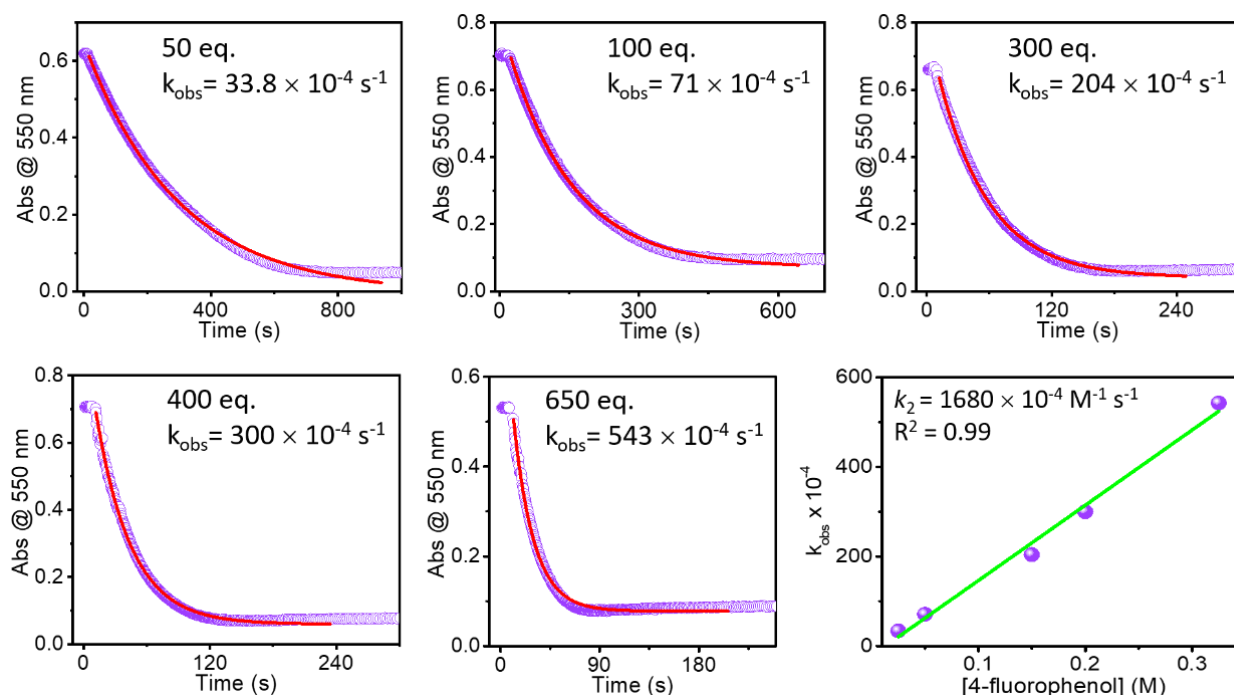

**Figure S34:** Decay of **2** followed at 550 nm in presence of various concentrations of 4-fluorophenol to give pseudo-first-order rate constants ( $k_{\text{obs}}$ ) in 3:1  $\text{CH}_3\text{CN}:\text{H}_2\text{O}$  at 25 °C. The plot of  $k_{\text{obs}}$  against the concentrations of 4-fluorophenol to obtain a second-order-rate constant ( $k_2 = 1680 \times 10^{-4} \text{ M}^{-1}\text{s}^{-1}$ ). Conditions to generate **2**: 0.5 mM **1** in 3:1  $\text{CH}_3\text{CN}:\text{H}_2\text{O}$  + 10 eq.  $\text{HClO}_4$  and 10 eq. aqueous  $\text{NaOCl}$ .

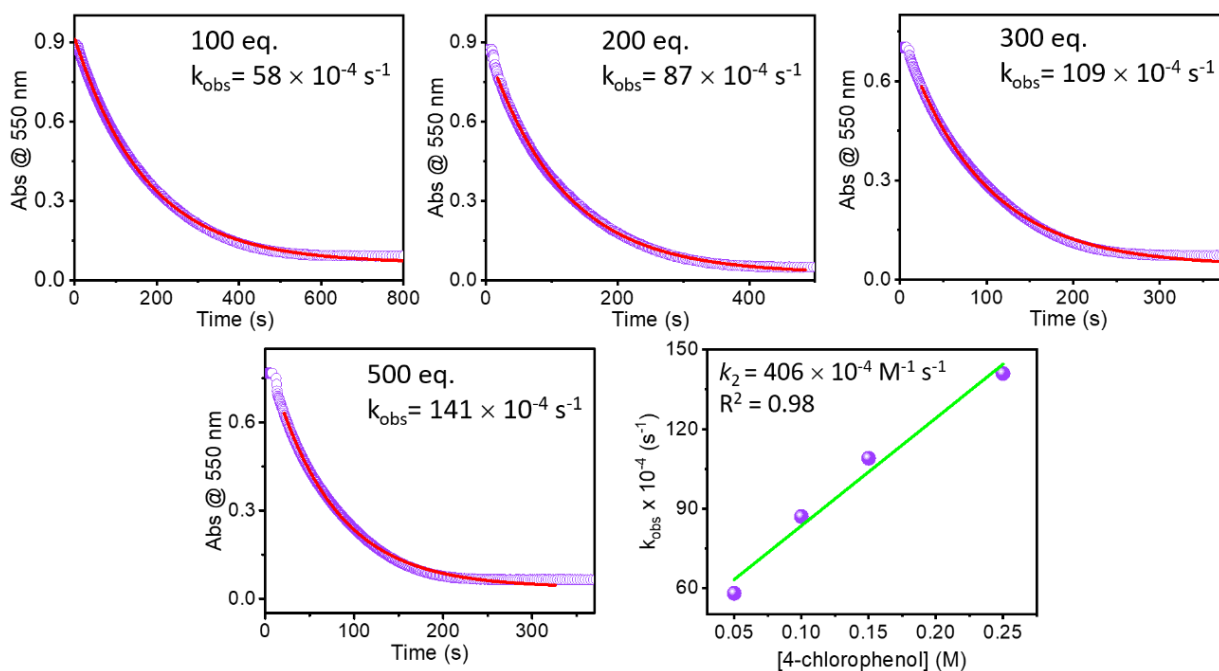

**Figure S35:** Decay of **2** followed at 550 nm in presence of various concentrations of 4-chlorophenol to give pseudo-first-order rate constants ( $k_{\text{obs}}$ ) in 3:1  $\text{CH}_3\text{CN}:\text{H}_2\text{O}$  at 25 °C. The plot of  $k_{\text{obs}}$  against the concentrations of 4-chlorophenol to obtain a second-order-rate constant ( $k_2 = 406 \times 10^{-4} \text{ M}^{-1} \text{ s}^{-1}$ ). Conditions to generate **2**: 0.5 mM **1** in 3:1  $\text{CH}_3\text{CN}:\text{H}_2\text{O}$  + 10 eq.  $\text{HClO}_4$  and 10 eq. aqueous  $\text{NaOCl}$ .

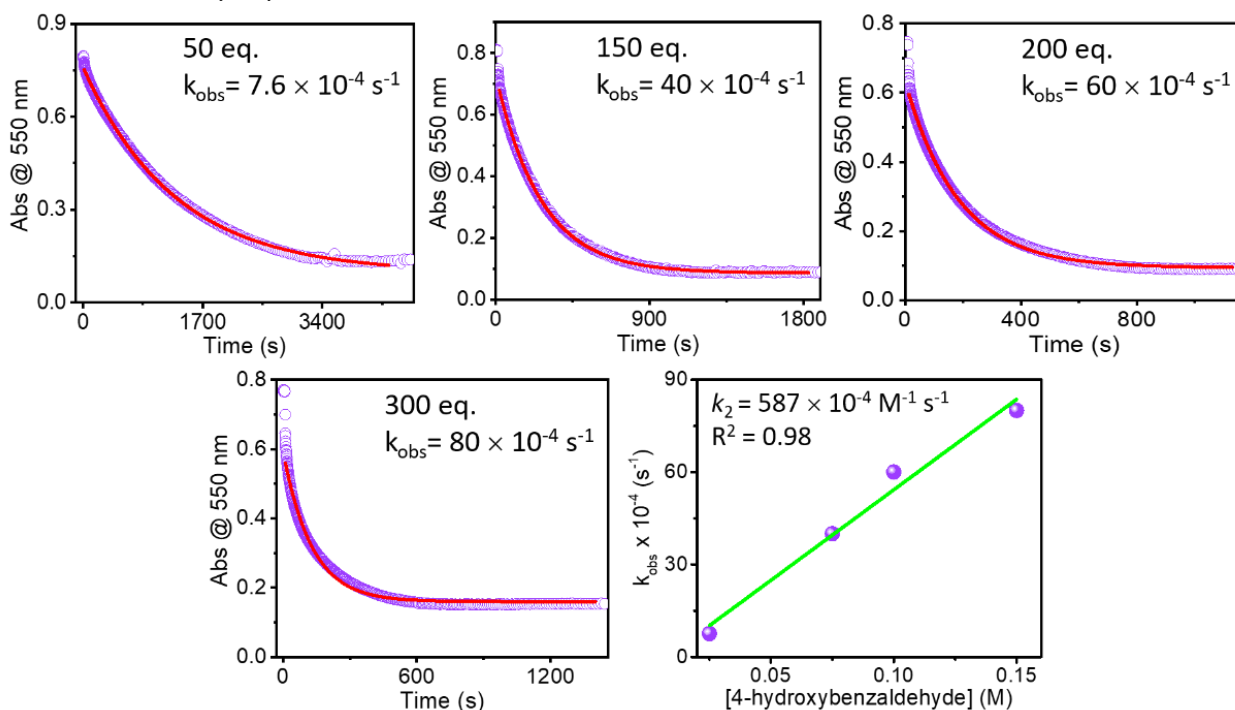

**Figure S36:** Decay of **2** followed at 550 nm in presence of various concentrations of 4-hydroxybenzaldehyde to give pseudo-first-order rate constants ( $k_{\text{obs}}$ ) in 3:1  $\text{CH}_3\text{CN}:\text{H}_2\text{O}$  at 25 °C. The plot of  $k_{\text{obs}}$  against the concentrations of 4-hydroxybenzaldehyde to obtain a second-order-rate constant ( $k_2 = 587 \times 10^{-4} \text{ M}^{-1} \text{ s}^{-1}$ ). Conditions to generate **2**: 0.5 mM **1** in 3:1  $\text{CH}_3\text{CN}:\text{H}_2\text{O}$  + 10 eq.  $\text{HClO}_4$  and 10 eq. aqueous  $\text{NaOCl}$ .



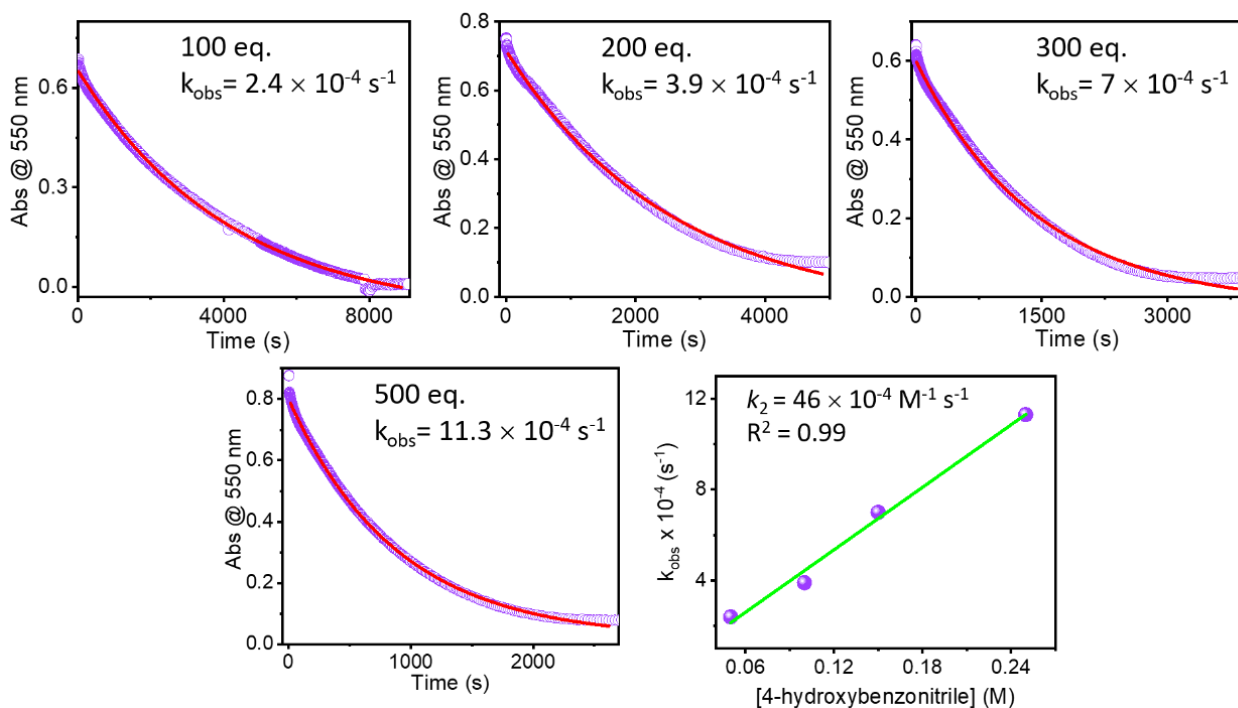

**Figure S37:** Decay of **2** followed at 550 nm in presence of various concentrations of 4-hydroxybenzointrile to give pseudo-first-order rate constants ( $k_{\text{obs}}$ ) in 3:1  $\text{CH}_3\text{CN}:\text{H}_2\text{O}$  at 25 °C. The plot of  $k_{\text{obs}}$  against the concentrations of 4-hydroxybenzointrile to obtain a second-order-rate constant ( $k_2 = 46 \times 10^{-4} \text{ M}^{-1}\text{s}^{-1}$ ). Conditions to generate **2**: 0.5 mM **1** in 3:1  $\text{CH}_3\text{CN}:\text{H}_2\text{O}$  + 10 eq.  $\text{HClO}_4$  and 10 eq. aqueous  $\text{NaOCl}$ .

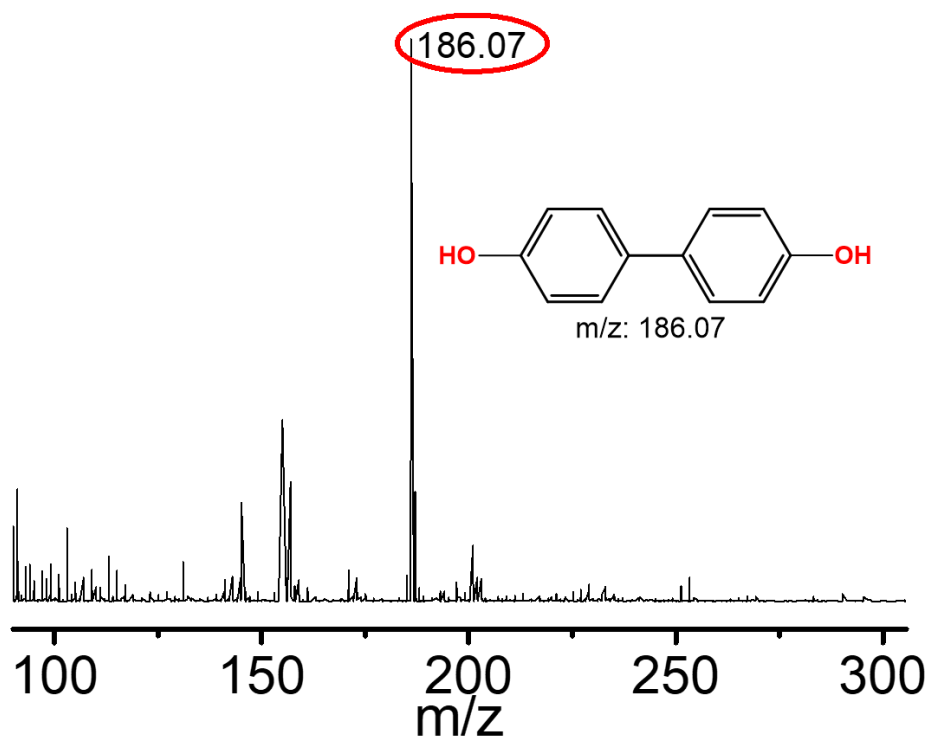

**Figure S38:** Product analysis of the reaction of **2** with 10 eq. phenol by APCI-MS. Conditions to generate **2**: 2.0 mM **1** in 3:1  $\text{CH}_3\text{CN}:\text{H}_2\text{O}$  + 10 eq.  $\text{HClO}_4$  and 10 eq. aqueous  $\text{NaOCl}$ .

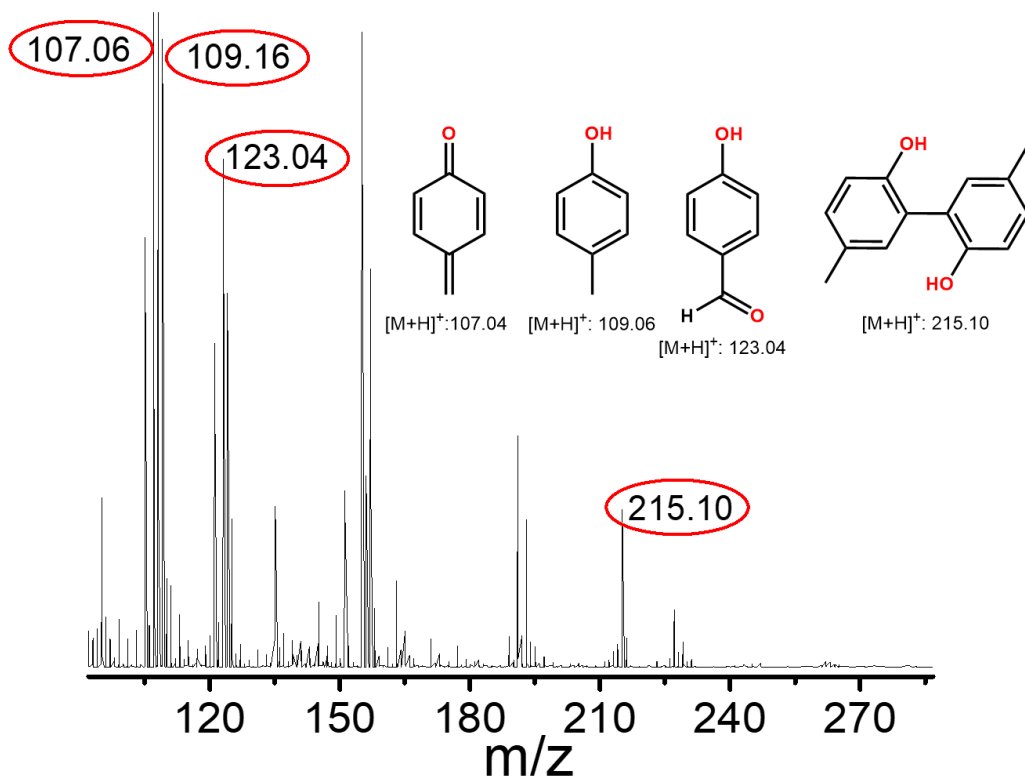

**Figure S39:** Product analysis of the reaction of **2** with 10 eq. *p*-cresol by APCI-MS. Conditions to generate **2**: 2.0 mM **1** in 3:1  $\text{CH}_3\text{CN}:\text{H}_2\text{O}$  + 10 eq.  $\text{HClO}_4$  and 10 eq. aqueous NaOCl.

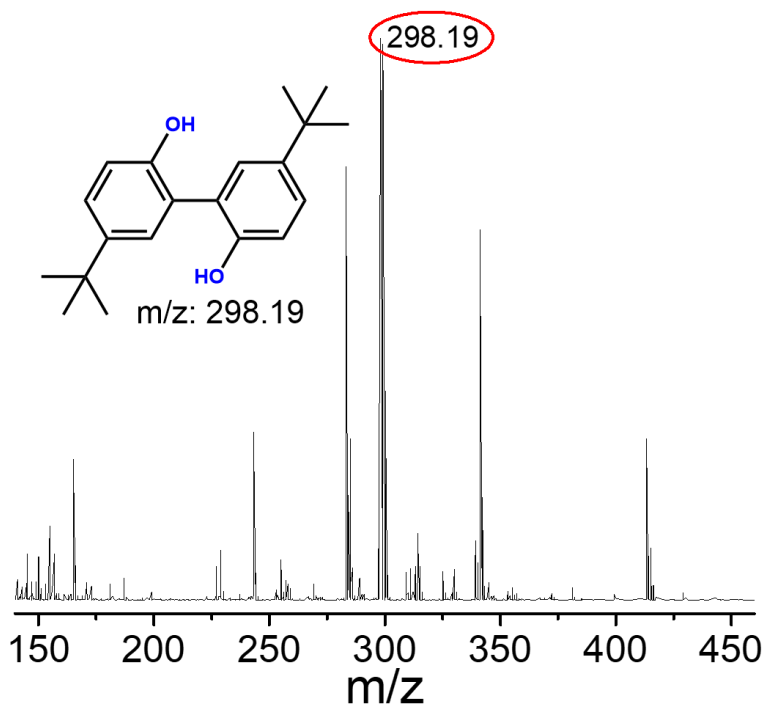

**Figure S40:** Product analysis of the reaction of **2** with 10 eq. 4-(*tert*-butyl)phenol by APCI-MS. Conditions to generate **2**: 2.0 mM **1** in 3:1  $\text{CH}_3\text{CN}:\text{H}_2\text{O}$  + 10 eq.  $\text{HClO}_4$  and 10 eq. aqueous NaOCl.

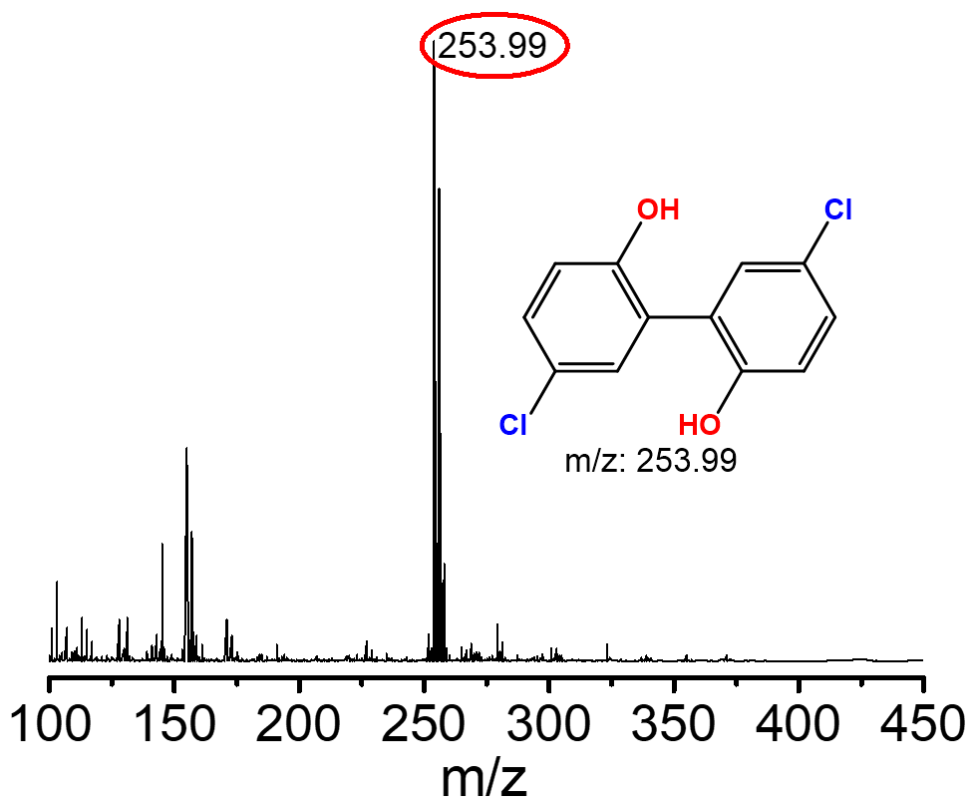

**Figure S41:** Product analysis of the reaction of **2** with 10 eq. 4-fluorophenol by APCI-MS. Conditions to generate **2**: 2.0 mM **1** in 3:1 CH<sub>3</sub>CN:H<sub>2</sub>O + 10 eq. HClO<sub>4</sub> and 10 eq. aqueous NaOCl.

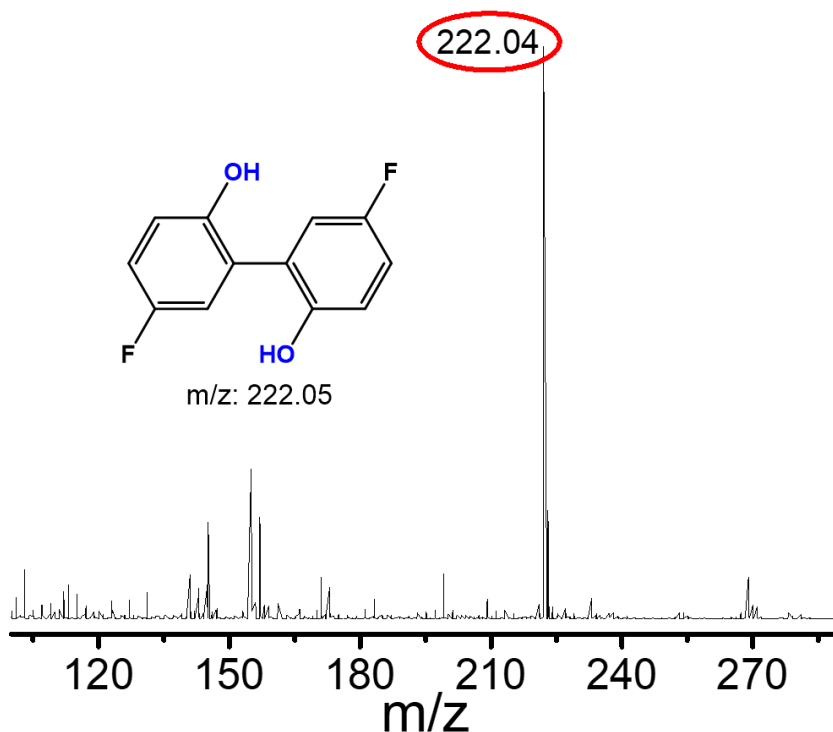

**Figure S42:** Product analysis of the reaction of **2** with 10 eq. 4-chlorophenol by APCI-MS. Conditions to generate **2**: 2.0 mM **1** in 3:1 CH<sub>3</sub>CN:H<sub>2</sub>O + 10 eq. HClO<sub>4</sub> and 10 eq. aqueous NaOCl.

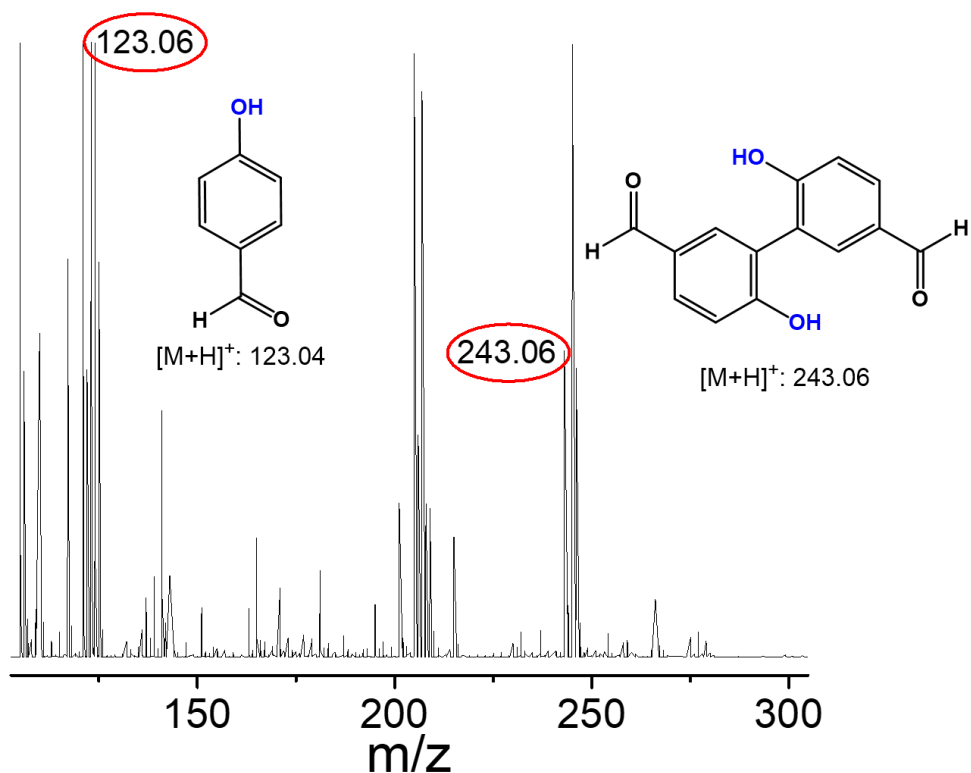

**Figure S43:** Product analysis of the reaction of **2** with 10 eq. 4-hydroxybenzaldehyde by APCI-MS. Conditions to generate **2**: 2.0 mM **1** in 3:1  $\text{CH}_3\text{CN}:\text{H}_2\text{O}$  + 10 eq.  $\text{HClO}_4$  and 10 eq. aqueous  $\text{NaOCl}$ .

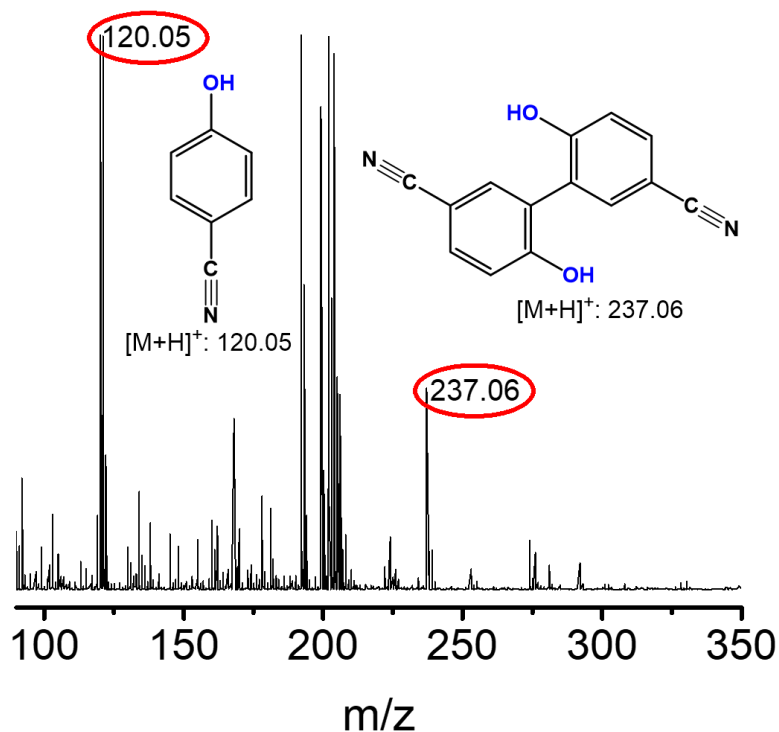

**Figure S44:** Product analysis of the reaction of **2** with 10 eq. 4-hydroxybenzotrile by APCI-MS. Conditions to generate **2**: 2.0 mM **1** in 3:1  $\text{CH}_3\text{CN}:\text{H}_2\text{O}$  + 10 eq.  $\text{HClO}_4$  and 10 eq. aqueous  $\text{NaOCl}$ .

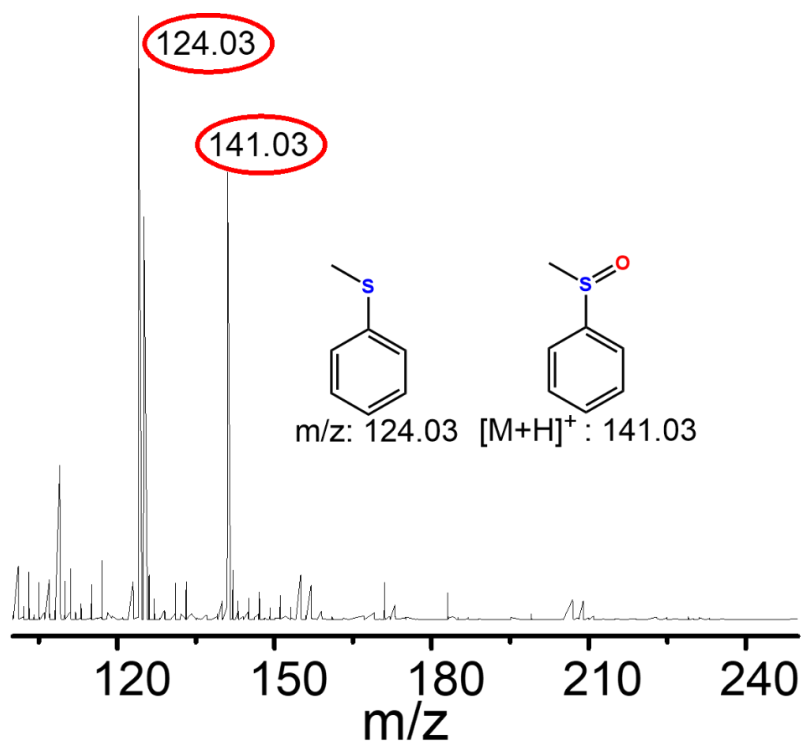

**Figure S45:** Product analysis of the reaction of thioanisole by APCI-MS. Reaction Conditions: 10 eq. thioanisole (8.5 M, 19  $\mu\text{L}$  in 3:1  $\text{CH}_3\text{CN}:\text{H}_2\text{O}$  (1500  $\mu\text{L}$  + 500  $\mu\text{L}$ ) + 1 eq.  $\text{HClO}_4$  (2 M, 8.32  $\mu\text{L}$ ) + 10 eq. aqueous  $\text{NaOCl}$  (2 M, 8.32  $\mu\text{L}$ ).

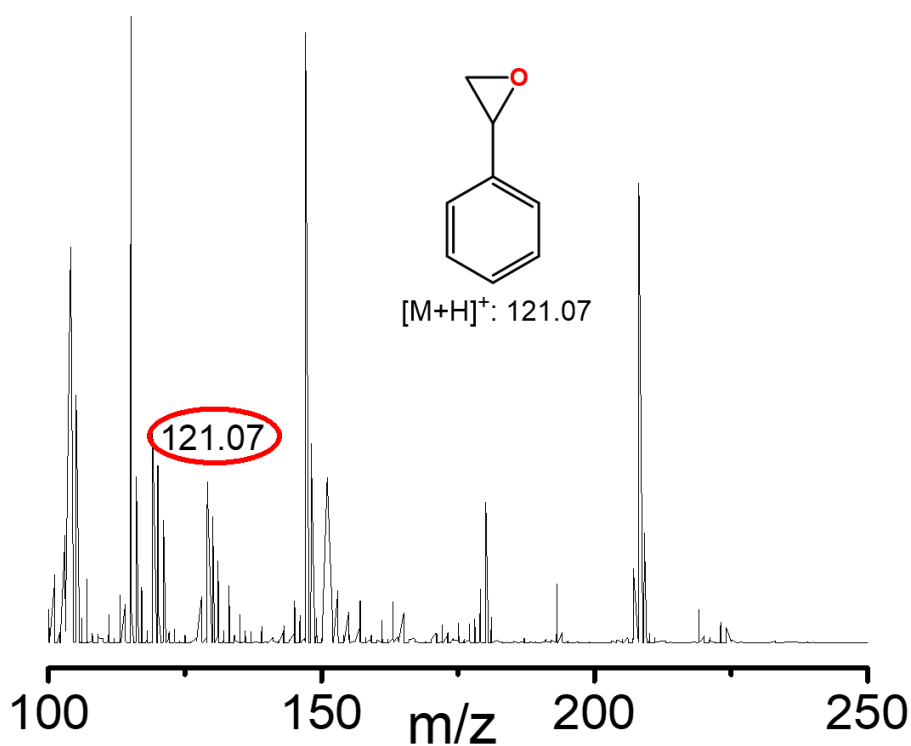

**Figure S46:** Product analysis of the reaction of styrene by APCI-MS. Reaction Conditions: 10 eq. Styrene (8.7 M, 22  $\mu\text{L}$ ) in 3:1  $\text{CH}_3\text{CN}:\text{H}_2\text{O}$  (1500  $\mu\text{L}$  + 500  $\mu\text{L}$ ) + 1 eq.  $\text{HClO}_4$  (2 M, 10  $\mu\text{L}$ ) + 10 eq. aqueous  $\text{NaOCl}$  (2 M, 10  $\mu\text{L}$ ).

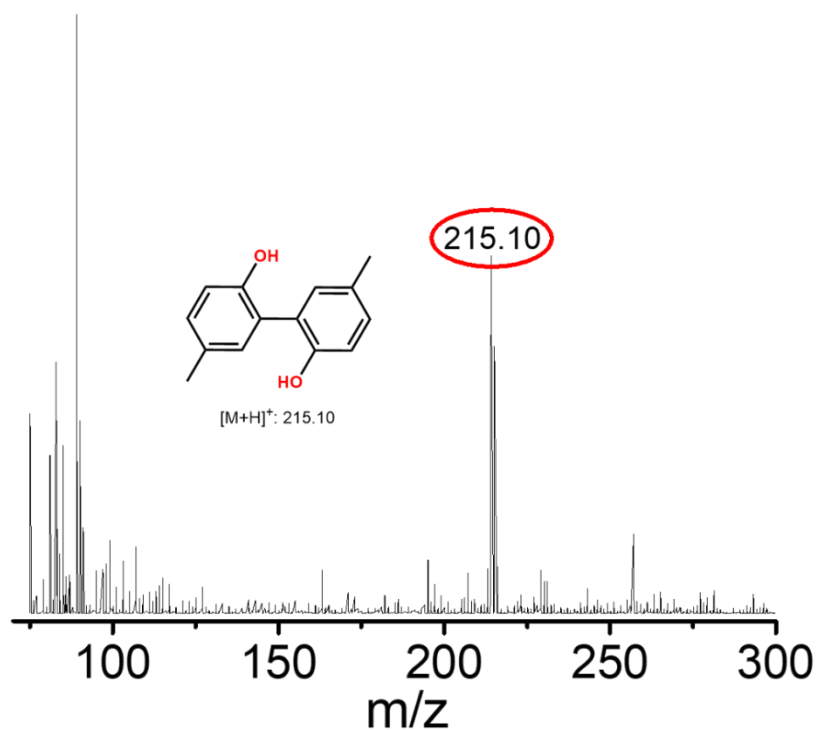

**Figure S47:** Product analysis of the reaction of *p*-cresol by APCI-MS. Reaction Conditions: 1 eq. *p*-cresol (4.3 mg) in 3:1 CH<sub>3</sub>CN:H<sub>2</sub>O (1500 μL + 500 μL) + 1 eq. HClO<sub>4</sub> (2 M, 20 μL) + 1 eq. aqueous NaOCl (2 M, 20 μL).

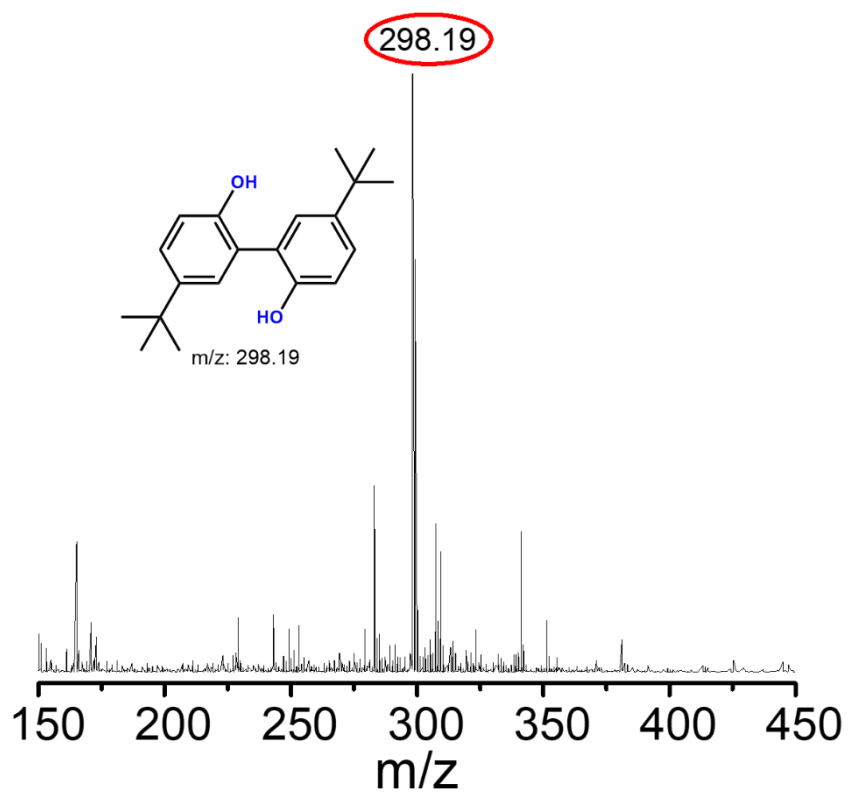

**Figure S48:** Product analysis of the reaction of 4-(*tert*-butyl)phenol by APCI-MS. Reaction Conditions: 1 eq. 4-(*tert*-butyl)phenol (6 mg) in 3:1 CH<sub>3</sub>CN:H<sub>2</sub>O (1500 μL + 500 μL) + 1 eq. HClO<sub>4</sub> (2 M, 20 μL) + 1 eq. aqueous NaOCl (2 M, 20 μL).

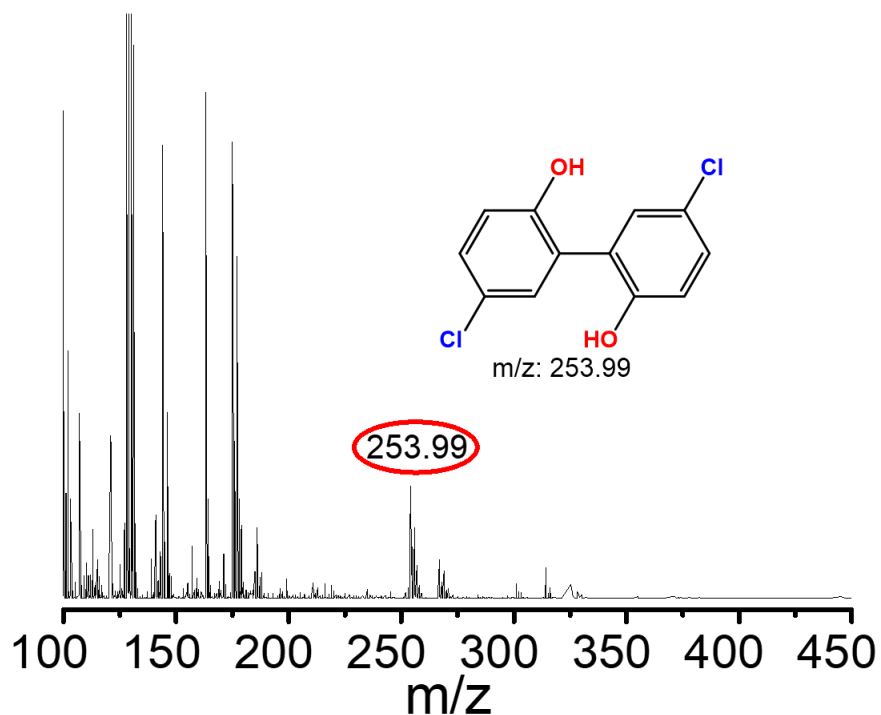

**Figure S49:** Product analysis of the reaction of 4-chlorophenol by APCI-MS. Reaction Conditions: 1 eq. 4-chlorophenol (5.1 mg) in 3:1  $\text{CH}_3\text{CN}:\text{H}_2\text{O}$  (1500  $\mu\text{L}$  + 500  $\mu\text{L}$ ) + 1 eq.  $\text{HClO}_4$  (2 M, 20  $\mu\text{L}$ ) + 1 eq. aqueous  $\text{NaOCl}$  (2 M, 20  $\mu\text{L}$ ).

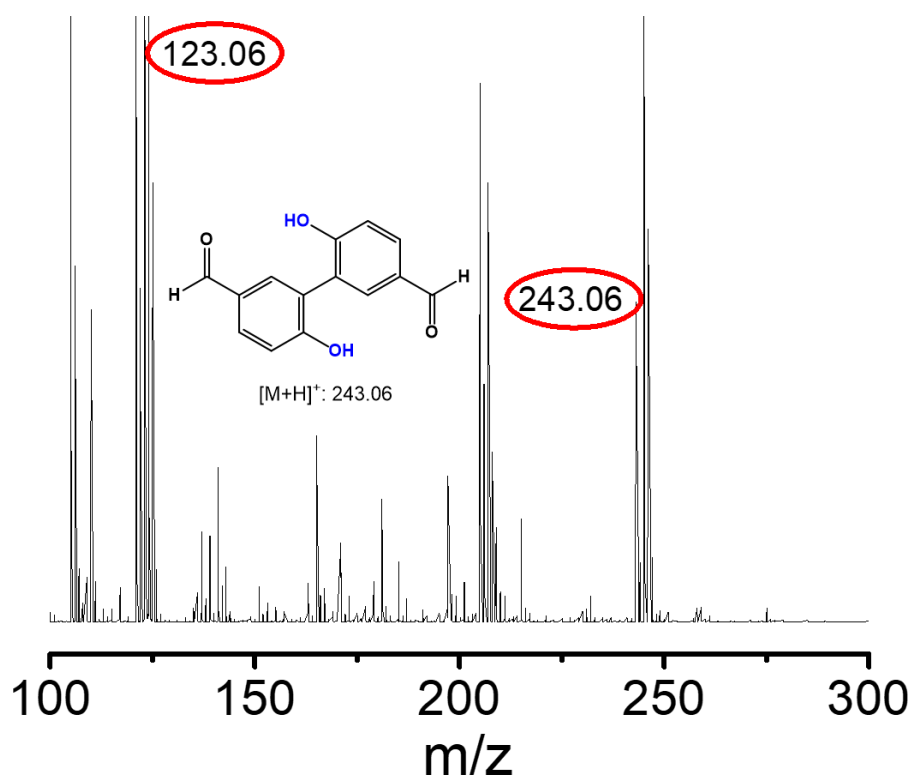

**Figure S50:** Product analysis of the reaction of 4-hydroxybenzaldehyde by APCI-MS. Reaction Conditions: 1 eq. 4-hydroxybenzaldehyde (4.88 mg) in 3:1  $\text{CH}_3\text{CN}:\text{H}_2\text{O}$  (1500  $\mu\text{L}$  + 500  $\mu\text{L}$ ) + 1 eq.  $\text{HClO}_4$  (2 M, 20  $\mu\text{L}$ ) + 1 eq. aqueous  $\text{NaOCl}$  (2 M, 20  $\mu\text{L}$ ).



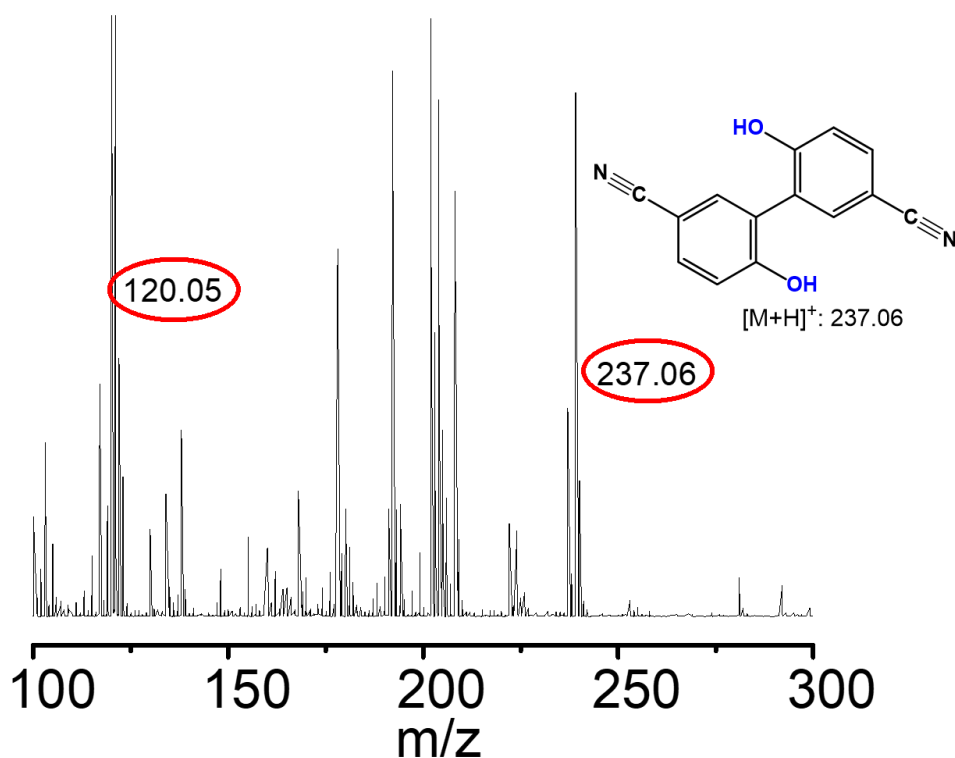

**Figure S51:** Product analysis of the reaction of 4-hydroxybenzonitrile by APCI-MS. Reaction Conditions: 1 eq. 4-hydroxybenzonitrile (4.76 mg) in 3:1 CH<sub>3</sub>CN:H<sub>2</sub>O (1500 μL + 500 μL) + 1 eq. HClO<sub>4</sub> (2 M, 20 μL) + 1 eq. aqueous NaOCl (2 M, 20 μL).

#### References:

- 
- [1] L. Duelund, R. Hazell, C. J. McKenzie, L. P. Nielsen and H. Toftlund, *J. Chem. Soc. Dalton Trans.*, 2001, **2**, 152–156.
- [2] R. Sharma, J. D. Knoll, P. D. Martin, I. Podgorski, C. Turro and J. J. Kodanko, *Inorg. Chem.*, 2014, **53**, 3272–3274.
- [3] S. Ohzu, T. Ishizuka, Y. Hirai, H. Jiang, M. Sakaguchi, T. Ogura, S. Fukuzumi and T. Kojima, *Chem. Sci.*, 2012, **3**, 3421–3431.
